# Supplementary material for: Drowning mortality by intent: a population-based cross-sectional study of 32 OECD countries, 2012–2014
Source: PubMed Central journal article supplement — BMJ Open. 2018 Jul 23;8(7):e021501. doi: 10.1136/bmjopen-2018-021501 (PMC6059339; doi:10.1136/bmjopen-2018-021501), 2018-07-23
Supplement: bmjopen-2018-021501.draft_revisions.pdf [file bmjopen-2018-021501.draft_revisions.pdf]

# BMJ Open

BMJ Open is committed to open peer review. As part of this commitment we make the peer review history of every article we publish publicly available.

When an article is published we post the peer reviewers' comments and the authors' responses online. We also post the versions of the paper that were used during peer review. These are the versions that the peer review comments apply to.

The versions of the paper that follow are the versions that were submitted during the peer review process. They are not the versions of record or the final published versions. They should not be cited or distributed as the published version of this manuscript.

BMJ Open is an open access journal and the full, final, typeset and author-corrected version of record of the manuscript is available on our site with no access controls, subscription charges or pay-per-view fees (<http://bmjopen.bmj.com>).

If you have any questions on BMJ Open's open peer review process please email [info.bmjopen@bmj.com](mailto:info.bmjopen@bmj.com)

# BMJ Open

## International comparisons of drowning mortality: intent-specific versus all-intents-combined

|                               |                                                                                                                                                                                                                                                 |
|-------------------------------|-------------------------------------------------------------------------------------------------------------------------------------------------------------------------------------------------------------------------------------------------|
| Journal:                      | <i>BMJ Open</i>                                                                                                                                                                                                                                 |
| Manuscript ID                 | bmjopen-2018-021501                                                                                                                                                                                                                             |
| Article Type:                 | Research                                                                                                                                                                                                                                        |
| Date Submitted by the Author: | 06-Jan-2018                                                                                                                                                                                                                                     |
| Complete List of Authors:     | Hsieh, Wanhua; Tzu Chi University, Department of Public Health<br>Wang, Chien-Hsing ; Buddhist Tzu Chi General Hospital, Department of Surgery and Trauma Center<br>Lu, Tsung-Hsueh; Institute of Public Health, National Cheng Kung University |
| Keywords:                     | drowning, mortality, international comparisons                                                                                                                                                                                                  |
|                               |                                                                                                                                                                                                                                                 |

SCHOLARONE™  
Manuscripts

Peer Review Only

1  
2  
3 **International comparisons of drowning mortality: intent-specific *versus***  
4  
5 **all-intents-combined**  
6  
7  
8  
9

10 Wan-Hua Hsieh,<sup>1</sup> Chien-Hsing Wang,<sup>2</sup> Tsung-Hsueh Lu<sup>3</sup>  
11  
12  
13  
14  
15

16  
17 <sup>1</sup> Department of Public Health, Tzu Chi University, Hualien, Taiwan  
18

19 <sup>2</sup> Division of Plastic Surgery, Department of Surgery and Trauma Center, Hualien Tzu Chi Hospital,  
20  
21 Buddhist Tzu Chi Medical Foundation, Hualien, Taiwan  
22  
23

24  
25 <sup>3</sup> NCKU Research Center for Health Data and Department of Public Health, National Cheng Kung  
26  
27 University, Tainan, Taiwan  
28  
29  
30  
31  
32

33 **Correspondence to**  
34

35  
36 Professor Tsung-Hsueh Lu;  
37

38  
39 robertlu@mail.ncku.edu.tw  
40  
41  
42  
43  
44  
45  
46  
47  
48  
49  
50  
51  
52  
53  
54  
55  
56  
57  
58  
59  
60

## ABSTRACT

**Objective** To compare the rankings of drowning mortality rates of the Organisation for Economic Co-operation and Development (OECD) countries according to intent-specific *versus* all-intents-combined.

**Design** A population-based cross-sectional study.

**Setting** 32 OECD countries.

**Participants** Population died from drowning

**Main outcome measures** Rankings of unintentional intent, intentional self-harm, assault, undetermined intent, and all-intent-combined drowning mortality rates (deaths per 100,000 population).

**Results** The proportions of various intents of drowning death were as follows: from 26.2% in Belgium to 96.8% in Chile for unintentional intent; 0.7% in Mexico to 57.4% in Belgium for intentional self-harm; 0.0% in nine countries to 4.9% in Mexico for assault; and 0.0% in Israel and Turkey to 38.3% in Austria for undetermined intent. Countries with the highest drowning mortality rates (deaths per 100000 population) were Estonia (3.53), Japan (3.49), and Greece (2.40) for unintentional intent; Ireland (0.96), Belgium (0.96), and Korea (0.89) for intentional self-harm; Austria (0.57), Korea (0.56), and Hungary (0.44) for undetermined intent; and Japan (4.35), Estonia (3.70), and Korea (2.73) for all-intents-combined. Korea ranked 12th and 3rd for unintentional intent and all-intents-combined, respectively. By contrast, Belgium ranked 2nd and 15th for intentional self-harm and all-intents-combined, respectively.

1  
2  
3  
4  
5  
6  
7  
8  
9  
10  
11  
12  
13  
14  
15  
16  
17  
18  
19  
20  
21  
22  
23  
24  
25  
26  
27  
28  
29  
30  
31  
32  
33  
34  
35  
36  
37  
38  
39  
40  
41  
42  
43  
44  
45  
46  
47  
48  
49  
50  
51  
52  
53  
54  
55  
56  
57  
58  
59  
60

**Conclusions** The all-intents-combined approach in addition to intent-specific approach can provide a more complete picture of the drowning problem of a country.

For peer review only

## Strengths and limitations of this study

- This study is the first study comparing drowning mortality rates according to intent-specific versus all-intent-combined, which can provide a more complete picture of drowning problem of a county.
- We combined mortality data for three years to ensure the statistical stability for comparisons.
- The criteria of classifying undetermined intent in each participating country was not available.

## INTRODUCTION

An international comparison of injury mortality rates is crucial to identify the unique features of the injury problem of a given country. An international comparison of unintentional drowning mortality rates indicated that drowning rate rankings of different countries differed according to age groups; the countries with the highest drowning rates were Kyrgyzstan for 0–4 years, Thailand for 5–14 years, Guyana for 15–24 years, Belarus for 25–44 years, Lithuania for 45–64 years, and Japan for  $\geq 65$  years.<sup>1</sup> However, several studies have indicated country and regional variations in the determination of intent (manner of death), such as unintentional (accidents), intentional self-harm (suicides), assault (homicides), and events of undetermined intent, which could hinder valid international comparisons of injury mortality rates.<sup>2–6</sup>

To improve the comparability between countries and across years within a single country, some scholars have proposed considering all-intent-combined versus intent-specific injury deaths to reveal a more comprehensive picture of the injury problem.<sup>7–10</sup> Theory and evidence supporting the all-intents-combined approach indicate that passive protection strategies through modification of products (smart gun or adding unpleasant odours and colours in pesticides), environmental interventions (fence on the roofs of high buildings and locking of used pesticides), and lethal means restriction (gun control and banning the use of lethal pesticides) are highly effective in preventing not only unintentional injuries but also intentional injuries.<sup>11–15</sup> The all-intents-combined approach has been used for the early identification of emerging drug-related poisoning problems in the United States and the drowning problem in Finland.<sup>16–21</sup> However, no study thus far has used the

1  
2 all-intents-combined approach to examine international variations in drowning mortality. In this  
3  
4  
5 study, we compared the rankings of intent-specific and all-intents-combined drowning mortality of  
6  
7  
8 countries of the Organisation for Economic Co-operation and Development (OECD).  
9

## 10 11 12 13 **METHODS**

14  
15  
16 Drowning mortality data of the OECD countries were extracted from the World Health  
17  
18  
19 Organization Cause of Death Query Online.<sup>22</sup> To ensure statistical stability in calculating the  
20  
21  
22 mortality rates, we combined data for latest available three years for international comparisons. The  
23  
24  
25 International Classification of Diseases Tenth Revision (ICD-10) codes for drowning mortality of  
26  
27  
28 different intents are ICD-10 codes W65-W74 for unintentional intent (accident), ICD-10 code X71  
29  
30  
31 for intentional self-harm (suicide), ICD-10 code X92 for assault (homicide), and ICD-10 code Y21  
32  
33  
34 for undetermined intent. We first computed the proportion of each intent for each country. We then  
35  
36  
37 calculated the undetermined intent/intentional self-harm ratio and all-intents-combined/  
38  
39  
40 unintentional intent ratio for each country. Next, age-adjusted mortality rates (deaths per 100000  
41  
42  
43 population) were calculated using the US 2000 age structure 0–14, 25–24, 25–44, 45–64, 65–74,  
44  
45  
46 and >75 years as standard. Rankings of the drowning rates of a country for each intent and  
47  
48  
49 all-intents-combined were illustrated using a bar chart.  
50  
51  
52

## 53 **RESULTS**

54  
55  
56 The number and proportion of each intent for the drowning mortality of different countries are  
57



1  
2 presented in Table 1 and Figure 1. The percentage of unintentional intent ranged from 26.2% in  
3  
4  
5 Belgium to 96.8% in Chile. The proportion of intentional self-harm ranged from 0.7% in Mexico to  
6  
7  
8 57.4% in Belgium, indicating a considerably large variation. The percentage of assault was less than  
9  
10  
11 1.0% in most countries except Mexico (4.9%) and Slovenia (1.5%). We also found a large variation  
12  
13  
14 in undetermined intent, from 0.0% in Israel and Turkey to 38.3% in Austria. Of the 32 OECD  
15  
16  
17 countries included in the study, 10 had an undetermined intent proportion of less than 3% and 8 had  
18  
19  
20 a proportion of more than 15%. The undetermined intent/intentional self-harm ratio (an indicator of  
21  
22  
23 underreported suicide) was highest in Mexico (12.35, 593/48) and Poland (7.53, 444/59). The  
24  
25  
26 all-intents-combined/unintentional intent ratio was highest in Belgium (3.82, 687/180) and Austria  
27  
28 (3.46, 446/129).

29  
30  
31 Countries with the highest drowning mortality rate (deaths per 100000 population) were  
32  
33  
34 Estonia (3.53), Japan (3.49), and Greece (2.40) for unintentional intent (Figure 2); Ireland (0.96),  
35  
36  
37 Belgium (0.96), and Korea (0.89) for intentional self-harm (Figure 3); Austria (0.57), Korea (0.56),  
38  
39  
40 and Hungary (0.44) for undetermined intent (Figure 4); and Japan (4.35), Estonia (3.70), and Korea  
41  
42 (2.73) for all-intents-combined (Figure 5). Korea ranked 12th and 3rd for unintentional intent and  
43  
44  
45 all-intents-combined, respectively. By contrast, Belgium ranked 2nd and 15th for intentional  
46  
47  
48 self-harm and all-intents-combined, respectively.

## 53 DISCUSSION

54  
55  
56 The findings of this study, which are consistent with those of previous studies,<sup>2-6</sup> indicate a large

1  
2 variation in the practice of classifying the undetermined intent of drowning deaths across countries;  
3  
4  
5 this variation hinders valid international comparisons of intent-specific (unintentional and  
6  
7  
8 intentional self-harm) drowning mortality rates. Korea and Belgium exhibited the largest variations  
9  
10  
11 in ranking when ranked according to the intent-specific approach and the all-intents-combined  
12  
13  
14 approach.

15  
16 According to a study involving eight European countries, a legal inquiry is compulsory for  
17  
18 every injury death in each participating country, and the inquiry is most commonly executed by  
19  
20  
21 legal authorities. However, differences in the classification practices (such as the efficiency of  
22  
23  
24 communication between the medical and legal authorities involved in suicide registration, the  
25  
26  
27 percentage of bodies of injury death performing forensic autopsies, level of medical training of the  
28  
29  
30 coders, and availability of inquiry results and forensic autopsy results to the final cause-of-death  
31  
32  
33 decision-maker) in different countries result in variations in the proportion of deaths classified as  
34  
35  
36 undetermined intent. The undetermined intent/suicide ratio was highest in Portugal during  
37  
38  
39 2000–2004 (0.78) and lowest in Austria during 2003–2007 (0.07).<sup>2</sup> In this study, we found eight  
40  
41  
42 countries (Austria, Czech Republic, Hungary, Japan, Mexico, Poland, Slovenia, and UK) with an  
43  
44  
45 undetermined intent/suicide ratio of more than 1; this could adversely affect the comparability of  
46  
47  
48 intentional self-harm drowning mortality rates across countries.

49  
50 With regard to the determination of intent (manner of death) of drowning death, ‘unintentional  
51  
52  
53 intent’ could be the assigned intent when witnesses were present during the drowning incident (e.g.  
54  
55  
56 children swimming or young people surfing in recreational water environments). By contrast, the

1  
2 intent 'intentional self-harm' could be assigned if witnesses were present when someone  
3  
4  
5 intentionally and voluntarily jumped off a bridge into a river. However, determining the intent of  
6  
7  
8 drowning for a body found in water is difficult. According to a study conducted by Lunetta et al, of  
9  
10  
11 1707 bodies that were found in water and were autopsied at the Department of Forensic Medicine,  
12  
13  
14 University of Helsinki from 1976 to 2000, 276 (16.2%) cases were assigned undetermined intent.  
15  
16  
17 Of 757 cases initially thought to be accidents by police investigators, pathologists involved with the  
18  
19  
20 autopsies agreed in 79.4% of the cases, whereas for suicide, homicide, and undetermined intent, the  
21  
22  
23 pathologists agreed in only 76.9%, 39.5%, and 18.7% of the cases, respectively.<sup>23</sup>  
24

25  
26  
27  
28  
29  
30  
31  
32  
33  
34  
35  
36  
37  
38  
39  
40  
41  
42  
43  
44  
45  
46  
47  
48  
49  
50  
51  
52  
53  
54  
55  
56  
57  
58  
59  
60

Because determining the intent of injury is difficult and because accumulated evidence suggests that environmental interventions could prevent not only unintentional injuries but also intentional injuries, counting injury deaths by using the all-intents-combined approach to identify all injury deaths with the same mechanism is recommended.<sup>7-10</sup> For example, in the United States, poisoning (n = 31116) was the second leading injury mechanism followed by motor vehicular accidents (n = 37985) in 2008, when the count was restricted to only unintentional intent. However, when we the all-intents-combined approach was used, poisoning (n = 41080) became the first leading injury mechanism and superseded motor vehicular accidents (n = 37985) in 2008.<sup>20</sup>

According to the findings of this study (Table 1), 12348 drowning deaths were identified using the all-intents-combined approach, which suggests that the use of this approach could identify 20% more drowning deaths (n = 2108) than did the use of only the unintentional intent approach (n = 10240).

1  
2  
3 Environmental interventions, such as the provision of effective lifeguard supervision and  
4  
5 rescue services, and the establishment of different recreation zones for different recreational  
6  
7 activities by using lines, buoys, and markers can prevent unintentional drowning.<sup>24</sup> Because many  
8  
9 intentional self-harm drownings were executed by jumping off a bridge, a systematic review  
10  
11 suggested that restricting access to these means by installing physical barriers can avert suicides at  
12  
13 hot spots (such as Grafton Bridge, Auckland, New Zealand; Clifton Suspension Bridge, Bristol,  
14  
15 United Kingdom; Ellington Bridge, Washington DC, United States) without substitution effects.<sup>25</sup>  
16  
17  
18  
19  
20  
21  
22  
23  
24

## 25 Strengths and limitations of this study

26  
27 The strength of this study is that it is the first to compare both intent-specific and  
28  
29 all-intents-combined drowning mortality across countries. However, several limitations should be  
30  
31 considered while interpreting the findings of this study. First, we did not include water transport  
32  
33 accidents (ICD-10 codes V90-V94) in this study because of the small number of deaths resulting  
34  
35 from these accidents in most countries. Second, unlike unintentional drowning (ICD-10 codes  
36  
37 W65-W74), which provides detailed information on the body of water (bathtub, swimming pool, or  
38  
39 natural water body) and the mechanism of drowning (while in water versus following fall into  
40  
41 water), no such information are available in intentional self-harm (ICD-10 code X71), assault  
42  
43 (ICD-10 code X92), and undetermined intent (ICD-10 code Y21). Therefore, we could not further  
44  
45 analyse the body of water and mechanisms of drowning involved in intentional drowning. Third, we  
46  
47 could not determine whether the considerably large variations in intentional self-harm drowning  
48  
49  
50  
51  
52  
53  
54  
55  
56  
57  
58  
59  
60

1  
2 mortality rates across countries were caused by actual differences in suicide rates or by differences  
3  
4  
5 in classifying undetermined intent.  
6  
7  
8  
9

## 10 CONCLUSIONS

11  
12  
13 The rankings of a country with regard to drowning mortality rates differ depending on whether the  
14  
15  
16 all-intents-combined approach or the intent-specific approach is used. We suggest that presenting an  
17  
18  
19 international comparison of drowning mortality using both approaches provides a more complete  
20  
21  
22 picture of the injury problem of each participating country.  
23  
24  
25  
26  
27  
28  
29  
30  
31  
32  
33  
34  
35  
36  
37  
38  
39  
40  
41  
42  
43  
44  
45  
46  
47  
48  
49  
50  
51  
52  
53  
54  
55  
56  
57  
58  
59  
60

1  
2  
3 **Acknowledgement** The authors thank Ms. Pai-Huan Lin for data analysis.  
4

5 **Contributors** WHH collected data and performed analysis and drafted and revised the manuscript.  
6

7  
8 CHW participated the interpretation of results and drafted and revised the manuscript. THL initiated  
9  
10 the idea and participated the interpretation of results and drafted and revised the manuscript and  
11  
12 supervised the study and is the guarantor.  
13  
14

15  
16 **Funding** None  
17

18  
19 **Competing interests** The authors have no competing interests to declare.  
20  
21

22 **Ethics approval** This study was approved by the Institutional Review Boards of Chi-Mei Medical  
23  
24 Center (10406-003) and TzuChi Hospital (104-67-B).  
25  
26

27  
28 **Data sharing:** No additional data available.  
29

30  
31 **Transparency statement:** The corresponding author confirms that the manuscript is an honest,  
32  
33 accurate, and transparent account of the study being reported; no crucial aspects of the study have  
34  
35 been omitted; and all discrepancies are disclosed.  
36  
37  
38  
39  
40  
41  
42  
43  
44  
45  
46  
47  
48  
49  
50  
51  
52  
53  
54  
55  
56  
57  
58  
59  
60

**REFERENCES**

1. Lin CY, Wang CF, Lu TH, Kawachi I. Unintentional drowning mortality, by age and body of water: an analysis of 60 countries. *Inj Prev* 2015;21:e43–e50.
2. Varnik P, Sisask M, Varnick A, et al. Suicide registration in eight European countries: a qualitative analysis of procedures and practices. *Forensic Sci Int* 2010;202:86-92.
3. Rockett IRH, Kapusta ND, Bhandari R. Suicide misclassification in an international context: revisitation and update. *Suicidology* 2011;2:48-61.
4. Pritchard C, Hansen L. Examining undetermined and accidental deaths as source of ‘under-reported-suicide’ by age and sex in twenty western countries. *Community Ment Health J* 2015;51:365-376.
5. Lu TH, Sun SM, Huang SM, Lin JJ. Mind your manners? Quality of manner of death certification among medical examiners and coroners in Taiwan. *Am J Forensic Med Pathol* 2006;27:352-354.
6. Breiding MJ, Wiersema B. Variability of undetermined manner of death classification in the US. *Inj Prev* 2006;12(Suppl II):ii49-ii54.
7. McLoughlin E, Annett JL, Fingerhut L, et al. Recommended framework for presenting injury mortality data. *MMWR Recommendations and Reports* 1997;46(No RR-14):1–30.
8. Fingerhut LA, McLoughlin E. Classifying and counting injury. In: Rivara FP, Cummings P, Koepsell TD, et al, eds. *Injury control: a guide to research and program evaluation*. Cambridge: Cambridge University Press, 2001: 15–31.

- 1  
2  
3 9. Minino AM, Anderson RN, Fingerhut LA, Boudreault MA, Warner M. Deaths: Injuries, 2002.  
4  
5 *National Vital Statistics Reports*; Vol 54 No 10. Hyattsville, MD: National Center for Health  
6  
7 Statistics, 2006.  
8  
9
- 10  
11 10. Warner M, Chen LH. Surveillance of injury mortality. In Li G and Baker SP (eds). *Injury*  
12  
13 *Research: Theories, Methods, and Approaches*. New York: Springer, 2012:3-21.  
14  
15
- 16  
17 11. Peek-Asa C, Zwerling C. Role of environmental interventions in injury control and prevention.  
18  
19 *Epidemiol Rev* 2003;25:77–89.  
20  
21
- 22  
23 12. Pruss-Ustun A, Corvalan C. How much disease burden can be prevented by environmental  
24  
25 interventions? *Epidemiology* 2007;18:167-178.  
26  
27
- 28  
29 13. Pollack KM, Kercher C, Frattaroli S, Peek-Asa C, Sleet D, Rivara FP. Toward environments  
30  
31 and policies that promote injury-free active living—it wouldn't hurt. *Health Place*  
32  
33 2012;18:106-114.  
34  
35
- 36  
37 14. Florentine JB, Crane C. Suicide prevention by limiting access to methods: a review of theory  
38  
39 and practice. *Soc Sci Med* 2010;70:1626-1632.  
40  
41
- 42  
43 15. Yip PSF, Caine E, Yousuf S, Chang SS, Wu KCC, Chen YY. Means restriction for suicide  
44  
45 prevention. *Lancet* 2012;379:2393-2399.  
46  
47
- 48  
49 16. Paulozzi LJ, Anest JL. US data show sharply rising drug-induced death rates. *Inj Prev*  
50  
51 2007;13:130-132.  
52
- 53  
54 17. Paulozzi LJ, Jones C, Mack K, Rudd R. Vital signs: overdoses of prescription opioid pain  
55  
56 relievers—United States, 1999-2008. *Morb Mortal Wkly Rep* 2011;60:1487-1492.  
57  
58



- 1  
2  
3 18. Mack K. Drug-induced deaths—United States, 1999-2010. *Morb Mortal Wkly Rep*  
4  
5 2013;62:161-163.  
6  
7
- 8 19. Jones CM, Mack KA, Paulozzi LJ. Pharmaceutical overdose deaths, United States, 2010.  
9  
10 *JAMA* 2013;309:657-659.  
11  
12
- 13 20. Bastian B, Lu L, Miniño A, et al. Injury mortality, United States: 1999–2014. National Center  
14  
15 for Health Statistics. National Vital Statistics System. 2016. Accessed May 20, 2017 at  
16  
17 <https://blogs.cdc.gov/nchs-data-visualization/injury-mortality-united-states-1999-2014/>  
18  
19
- 20 21. Lunetta P, Smith GS, Penttila A, Sajantila A. Unintentional drowning in Finland 1970-2000: a  
21  
22 population-based study. *Int J Epidemiol* 2004;33:1053-1063.  
23  
24
- 25 22. World Health Organization. Cause of Death Query Online: A Web-Based System for  
26  
27 Extracting Trend Series Detailed Cause-of-Death Data.  
28  
29 [http://apps.who.int/healthinfo/statistics/mortality/causeofdeath\\_query/](http://apps.who.int/healthinfo/statistics/mortality/causeofdeath_query/) Accessed at April 30,  
30  
31 2017.  
32  
33
- 34 23. Lunetta P, Smith GS, Penttila A, Sajantila A. Undetermined drowning. *Med Sci Law*  
35  
36 2003;43:207-214.  
37  
38
- 39 24. World Health Organization. *Guidelines for safe water environments. Volume 1: coastal and*  
40  
41 *fresh waters*. Geneva, Switzerland: World Health Organization, 2003.  
42  
43  
44
- 45 25. Cox GR, Owens C, Robinson J, et al. Interventions to reduce suicides at suicide hotspots: a  
46  
47 systematic review. *BMC Public Health* 2013;13:214.  
48  
49  
50  
51  
52  
53  
54  
55  
56

Table 1. The number and proportion of each intent in drowning mortality in each OECD country

| Country, data year      | (1) All-intents-combined |       | (2) Unintentional |      | (3) Intentional self-harm |      | (4) Assault |     | (5) Undetermined intent |      | (5)/(3) | (1)/(2) |
|-------------------------|--------------------------|-------|-------------------|------|---------------------------|------|-------------|-----|-------------------------|------|---------|---------|
|                         | No.                      | %     | No.               | %    | No.                       | %    | No.         | %   | No.                     | %    |         |         |
| Australia, 2012-14      | 793                      | 100.0 | 591               | 74.5 | 156                       | 19.7 | 5           | 0.6 | 41                      | 5.2  | 0.26    | 1.34    |
| Austria, 2012-14        | 446                      | 100.0 | 129               | 28.9 | 146                       | 32.7 | 0           | 0.0 | 171                     | 38.3 | 1.17    | 3.46    |
| Belgium, 2012-14        | 687                      | 100.0 | 180               | 26.2 | 394                       | 57.4 | 7           | 1.0 | 106                     | 15.4 | 0.27    | 3.82    |
| Canada, 2010-12         | 1241                     | 100.0 | 840               | 67.7 | 301                       | 24.3 | 9           | 0.7 | 91                      | 7.3  | 0.30    | 1.48    |
| Chile, 2012-14          | 1022                     | 100.0 | 989               | 96.8 | 28                        | 2.7  | 5           | 0.5 | 0                       | 0.0  | 0.00    | 1.03    |
| Czech Republic, 2013-15 | 627                      | 100.0 | 484               | 77.2 | 63                        | 10.0 | 2           | 0.3 | 78                      | 12.4 | 1.24    | 1.30    |
| Denmark, 2012-14        | 205                      | 100.0 | 97                | 47.3 | 94                        | 45.9 | 1           | 0.5 | 13                      | 6.3  | 0.14    | 2.11    |
| Estonia, 2012-14        | 161                      | 100.0 | 153               | 95.0 | 5                         | 3.1  | 0           | 0.0 | 3                       | 1.9  | 0.60    | 1.05    |
| Finland, 2012-14        | 510                      | 100.0 | 332               | 65.1 | 117                       | 22.9 | 3           | 0.6 | 58                      | 11.4 | 0.50    | 1.54    |
| France, 2011-13         | 4147                     | 100.0 | 2818              | 68.0 | 1277                      | 30.8 | 11          | 0.3 | 41                      | 1.0  | 0.03    | 1.47    |
| Germany, 2012-14        | 2295                     | 100.0 | 1271              | 55.4 | 752                       | 32.8 | 6           | 0.3 | 266                     | 11.6 | 0.35    | 1.81    |
| Greece, 2014            | 363                      | 100.0 | 349               | 96.1 | 10                        | 2.8  | 0           | 0.0 | 4                       | 1.1  | 0.40    | 1.04    |
| Hungary, 2013-15        | 651                      | 100.0 | 372               | 57.1 | 127                       | 19.5 | 3           | 0.5 | 149                     | 22.9 | 1.17    | 1.75    |
| Ireland, 2011-13        | 348                      | 100.0 | 159               | 45.7 | 133                       | 38.2 | 1           | 0.3 | 55                      | 15.8 | 0.41    | 2.19    |
| Israel, 2012-14         | 155                      | 100.0 | 148               | 95.5 | 7                         | 4.5  | 0           | 0.0 | 0                       | 0.0  | 0.00    | 1.05    |
| Italy, 2010-12          | 1668                     | 100.0 | 1124              | 67.4 | 534                       | 32.0 | 8           | 0.5 | 2                       | 0.1  | 0.00    | 1.48    |
| Japan, 2012-14          | 27383                    | 100.0 | 22940             | 83.8 | 2166                      | 7.9  | 10          | 0.0 | 2267                    | 8.3  | 1.05    | 1.19    |
| Korea, 2011-13          | 4337                     | 100.0 | 1980              | 45.7 | 1441                      | 33.2 | 14          | 0.3 | 902                     | 20.8 | 0.63    | 2.19    |
| Mexico, 2012-14         | 6970                     | 100.0 | 5990              | 85.9 | 48                        | 0.7  | 339         | 4.9 | 593                     | 8.5  | 12.35   | 1.16    |
| Netherlands, 2013-15    | 585                      | 100.0 | 244               | 41.7 | 327                       | 55.9 | 2           | 0.3 | 12                      | 2.1  | 0.04    | 2.40    |
| New Zealand, 2010-12    | 211                      | 100.0 | 175               | 82.9 | 29                        | 13.7 | 2           | 0.9 | 5                       | 2.4  | 0.17    | 1.21    |
| Norway, 2012-14         | 265                      | 100.0 | 171               | 64.5 | 89                        | 33.6 | 0           | 0.0 | 5                       | 1.9  | 0.06    | 1.55    |
| Poland, 2012-14         | 3005                     | 100.0 | 2502              | 83.3 | 59                        | 2.0  | 0           | 0.0 | 444                     | 14.8 | 7.53    | 1.20    |

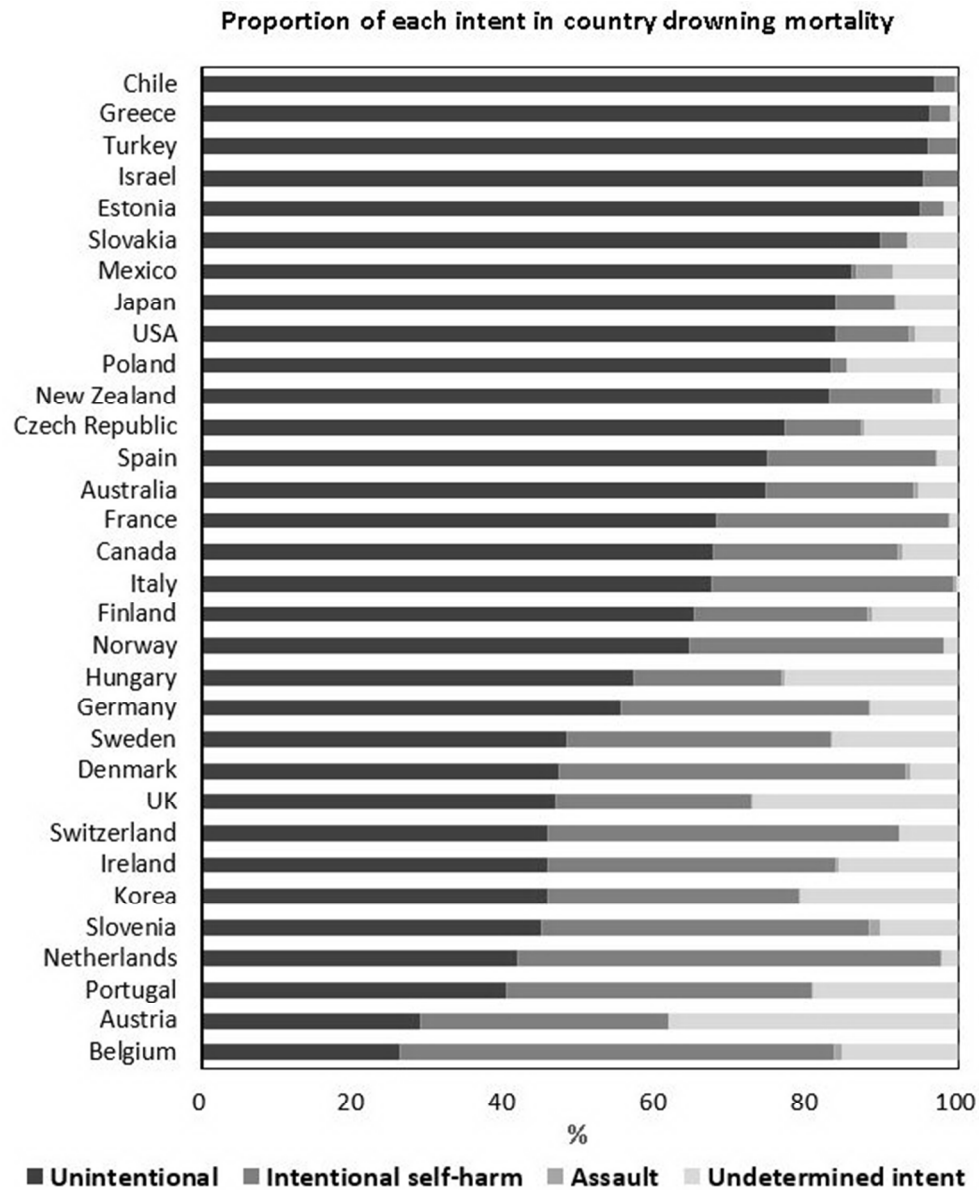

Figure 1. Proportion of intents in drowning mortality in each OECD country.

164x199mm (96 x 96 DPI)

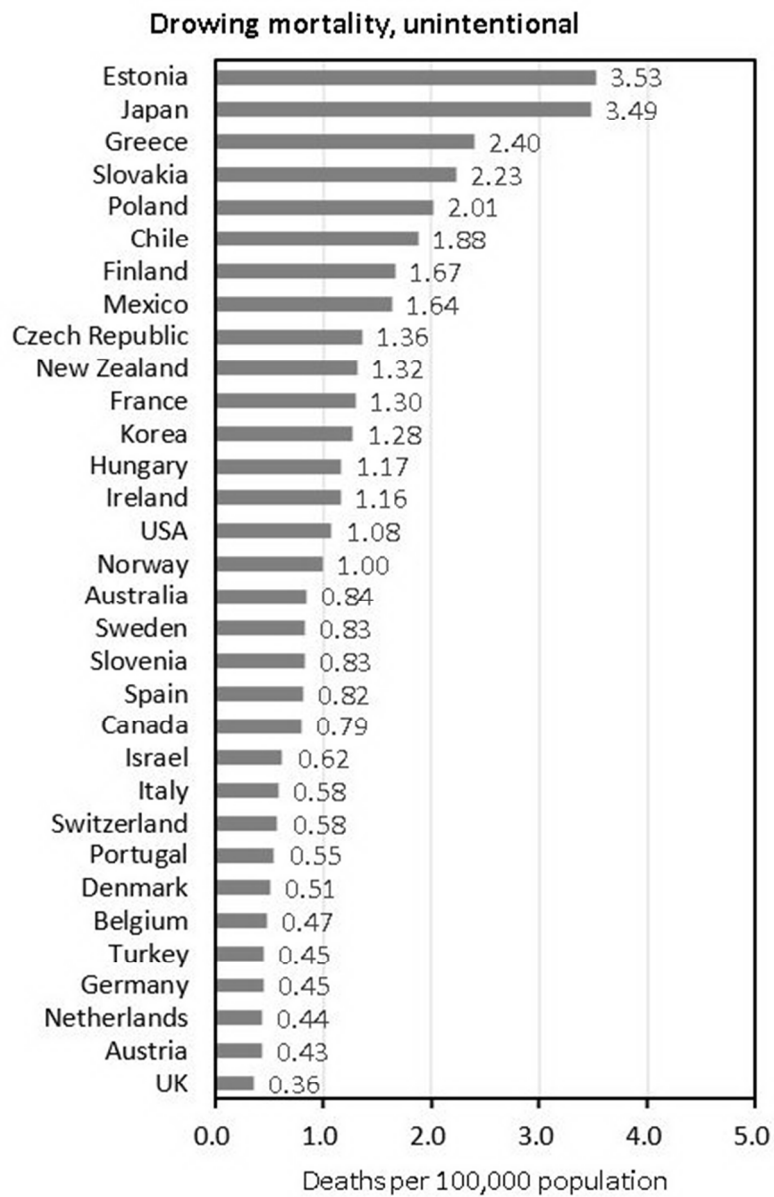

Figure 2 Unintentional drowning mortality in each OECD country.

129x193mm (96 x 96 DPI)

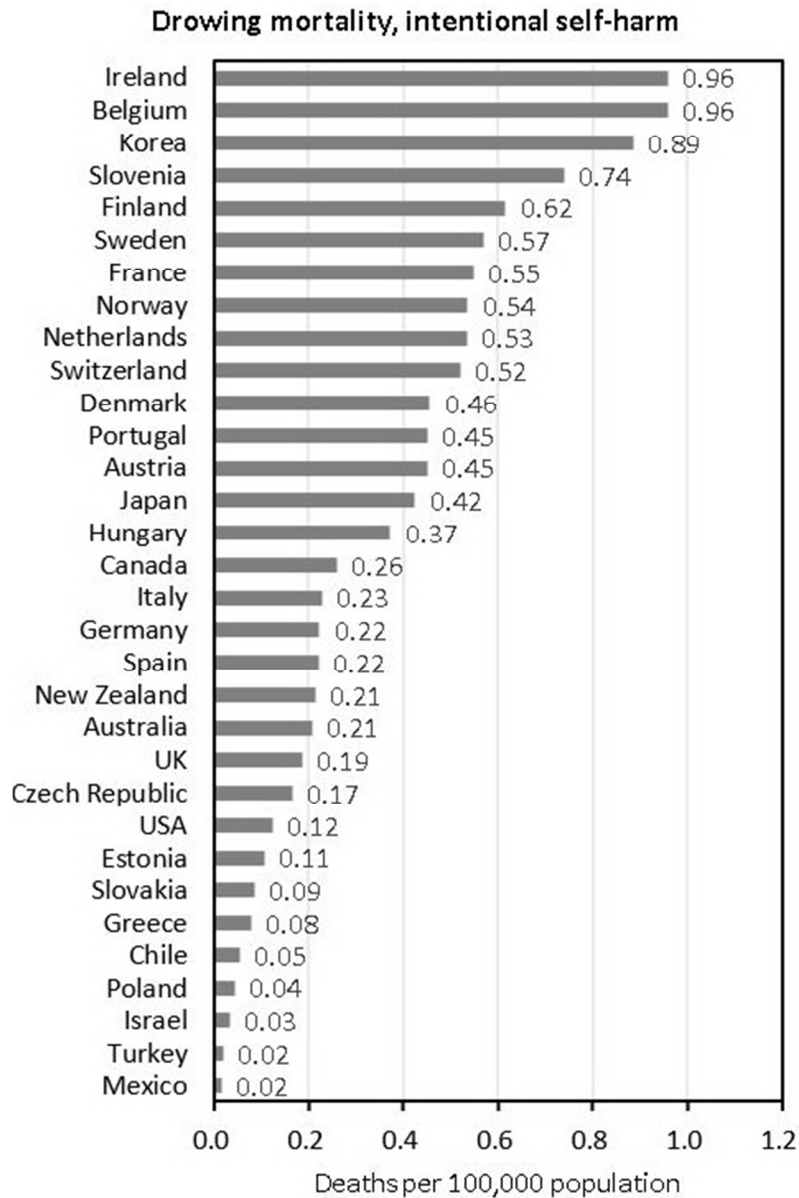

45 Figure 3 Intentional self-harm (suicide) drowning mortality in each OECD country.

46  
47 128x192mm (96 x 96 DPI)

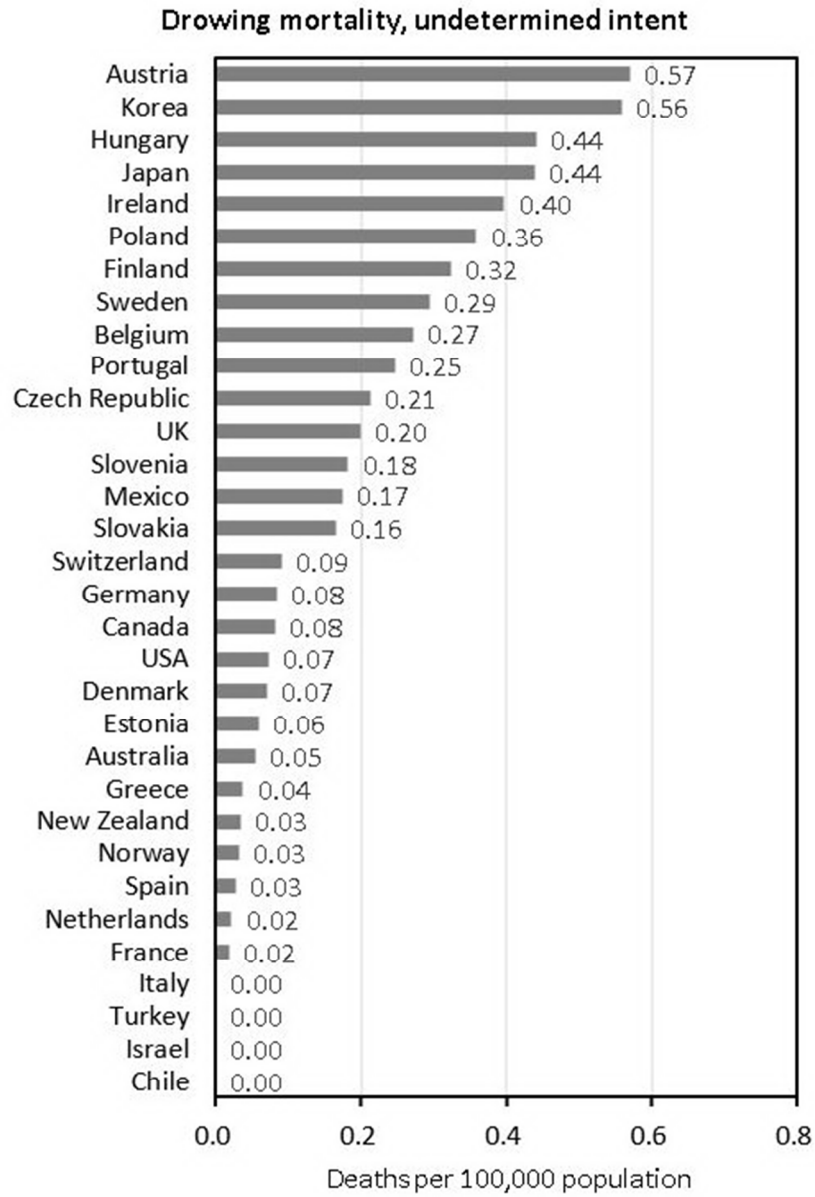

Figure 4 Undetermined intent drowning mortality in each OECD country.

136x193mm (96 x 96 DPI)

1  
2  
3  
4  
5  
6  
7  
8  
9  
10  
11  
12  
13  
14  
15  
16  
17  
18  
19  
20  
21  
22  
23  
24  
25  
26  
27  
28  
29  
30  
31  
32  
33  
34  
35  
36  
37  
38  
39  
40  
41  
42  
43  
44  
45  
46  
47  
48  
49  
50  
51  
52  
53  
54  
55  
56  
57  
58  
59  
60

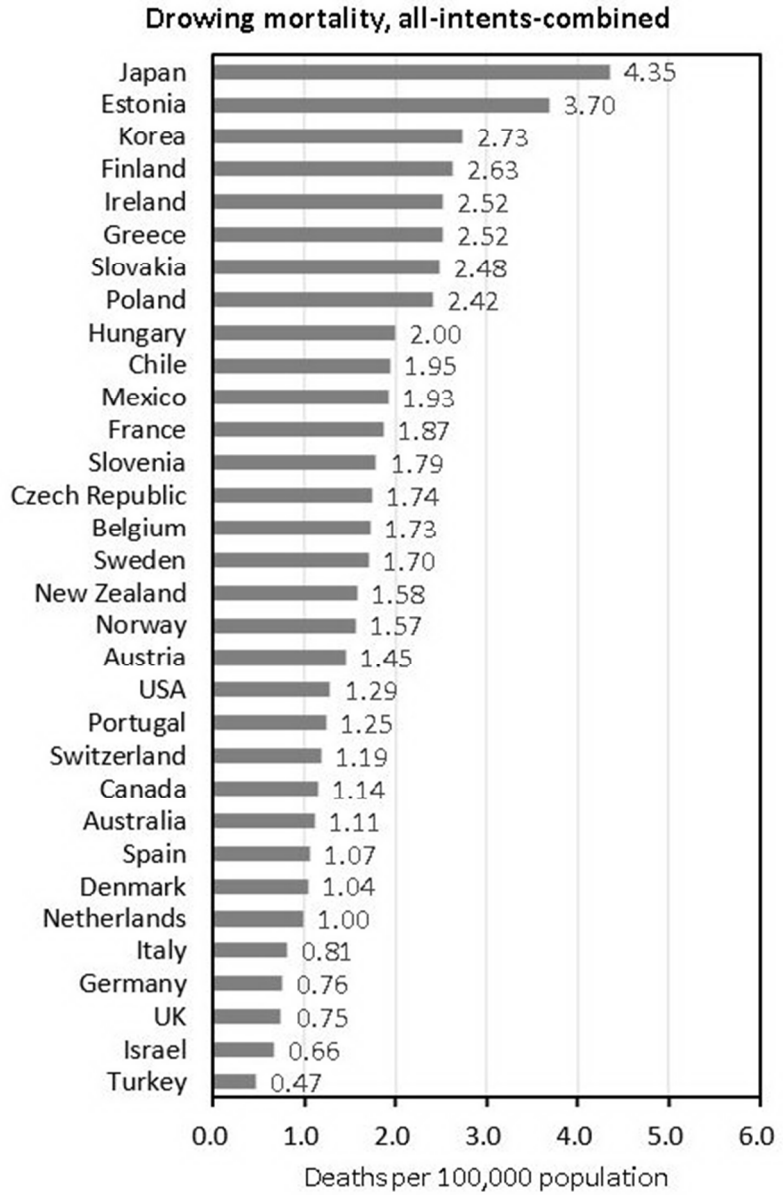

Figure 5 All-intents-combined drowning mortality in each OECD country.

129x193mm (96 x 96 DPI)

STROBE Statement—Checklist of items that should be included in reports of *cross-sectional studies*

|                           | Item No | Recommendation                                                                                                                                                                                               | Page |
|---------------------------|---------|--------------------------------------------------------------------------------------------------------------------------------------------------------------------------------------------------------------|------|
| <b>Title and abstract</b> | 1       | (a) Indicate the study's design with a commonly used term in the title or the abstract                                                                                                                       | 1    |
|                           |         | (b) Provide in the abstract an informative and balanced summary of what was done and what was found                                                                                                          | 2    |
| <b>Introduction</b>       |         |                                                                                                                                                                                                              |      |
| Background/rationale      | 2       | Explain the scientific background and rationale for the investigation being reported                                                                                                                         | 5    |
| Objectives                | 3       | State specific objectives, including any prespecified hypotheses                                                                                                                                             | 6    |
| <b>Methods</b>            |         |                                                                                                                                                                                                              |      |
| Study design              | 4       | Present key elements of study design early in the paper                                                                                                                                                      | 6    |
| Setting                   | 5       | Describe the setting, locations, and relevant dates, including periods of recruitment, exposure, follow-up, and data collection                                                                              | 6    |
| Participants              | 6       | (a) Give the eligibility criteria, and the sources and methods of selection of participants                                                                                                                  | 6    |
| Variables                 | 7       | Clearly define all outcomes, exposures, predictors, potential confounders, and effect modifiers. Give diagnostic criteria, if applicable                                                                     | 6    |
| Data sources/measurement  | 8*      | For each variable of interest, give sources of data and details of methods of assessment (measurement). Describe comparability of assessment methods if there is more than one group                         | 6    |
| Bias                      | 9       | Describe any efforts to address potential sources of bias                                                                                                                                                    | 10   |
| Study size                | 10      | Explain how the study size was arrived at                                                                                                                                                                    | NA   |
| Quantitative variables    | 11      | Explain how quantitative variables were handled in the analyses. If applicable, describe which groupings were chosen and why                                                                                 | 6    |
| Statistical methods       | 12      | (a) Describe all statistical methods, including those used to control for confounding                                                                                                                        | 6    |
|                           |         | (b) Describe any methods used to examine subgroups and interactions                                                                                                                                          | NA   |
|                           |         | (c) Explain how missing data were addressed                                                                                                                                                                  | 10   |
|                           |         | (d) If applicable, describe analytical methods taking account of sampling strategy                                                                                                                           | NA   |
|                           |         | (e) Describe any sensitivity analyses                                                                                                                                                                        | NA   |
| <b>Results</b>            |         |                                                                                                                                                                                                              |      |
| Participants              | 13*     | (a) Report numbers of individuals at each stage of study—eg numbers potentially eligible, examined for eligibility, confirmed eligible, included in the study, completing follow-up, and analysed            | NA   |
|                           |         | (b) Give reasons for non-participation at each stage                                                                                                                                                         | NA   |
|                           |         | (c) Consider use of a flow diagram                                                                                                                                                                           | No   |
| Descriptive data          | 14*     | (a) Give characteristics of study participants (eg demographic, clinical, social) and information on exposures and potential confounders                                                                     | NA   |
|                           |         | (b) Indicate number of participants with missing data for each variable of interest                                                                                                                          | NA   |
| Outcome data              | 15*     | Report numbers of outcome events or summary measures                                                                                                                                                         | 7    |
| Main results              | 16      | (a) Give unadjusted estimates and, if applicable, confounder-adjusted estimates and their precision (eg, 95% confidence interval). Make clear which confounders were adjusted for and why they were included | No   |



|                          |    |                                                                                                                                                                            |    |
|--------------------------|----|----------------------------------------------------------------------------------------------------------------------------------------------------------------------------|----|
|                          |    | (b) Report category boundaries when continuous variables were categorized                                                                                                  | No |
|                          |    | (c) If relevant, consider translating estimates of relative risk into absolute risk for a meaningful time period                                                           | No |
| Other analyses           | 17 | Report other analyses done—eg analyses of subgroups and interactions, and sensitivity analyses                                                                             | No |
| <b>Discussion</b>        |    |                                                                                                                                                                            |    |
| Key results              | 18 | Summarise key results with reference to study objectives                                                                                                                   | 8  |
| Limitations              | 19 | Discuss limitations of the study, taking into account sources of potential bias or imprecision. Discuss both direction and magnitude of any potential bias                 | 10 |
| Interpretation           | 20 | Give a cautious overall interpretation of results considering objectives, limitations, multiplicity of analyses, results from similar studies, and other relevant evidence | 9  |
| Generalisability         | 21 | Discuss the generalisability (external validity) of the study results                                                                                                      | 9  |
| <b>Other information</b> |    |                                                                                                                                                                            |    |
| Funding                  | 22 | Give the source of funding and the role of the funders for the present study and, if applicable, for the original study on which the present article is based              | NA |

\*Give information separately for exposed and unexposed groups.

**Note:** An Explanation and Elaboration article discusses each checklist item and gives methodological background and published examples of transparent reporting. The STROBE checklist is best used in conjunction with this article (freely available on the Web sites of PLoS Medicine at <http://www.plosmedicine.org/>, Annals of Internal Medicine at <http://www.annals.org/>, and Epidemiology at <http://www.epidem.com/>). Information on the STROBE Initiative is available at [www.strobe-statement.org](http://www.strobe-statement.org).

# BMJ Open

## Drowning mortality by intent: a population-based cross-sectional study of 32 OECD countries, 2012–2014

|                                 |                                                                                                                                                                                                                                                 |
|---------------------------------|-------------------------------------------------------------------------------------------------------------------------------------------------------------------------------------------------------------------------------------------------|
| Journal:                        | <i>BMJ Open</i>                                                                                                                                                                                                                                 |
| Manuscript ID                   | bmjopen-2018-021501.R1                                                                                                                                                                                                                          |
| Article Type:                   | Research                                                                                                                                                                                                                                        |
| Date Submitted by the Author:   | 27-Mar-2018                                                                                                                                                                                                                                     |
| Complete List of Authors:       | Hsieh, Wanhua; Tzu Chi University, Department of Public Health<br>Wang, Chien-Hsing ; Buddhist Tzu Chi General Hospital, Department of Surgery and Trauma Center<br>Lu, Tsung-Hsueh; Institute of Public Health, National Cheng Kung University |
| <b>Primary Subject Heading</b>: | Epidemiology                                                                                                                                                                                                                                    |
| Secondary Subject Heading:      | Public health                                                                                                                                                                                                                                   |
| Keywords:                       | drowning, mortality, international comparisons                                                                                                                                                                                                  |
|                                 |                                                                                                                                                                                                                                                 |

SCHOLARONE™  
Manuscripts

Peer Review Only

1  
2  
3 **Drowning mortality by intent: a population-based cross-sectional study of 32**  
4  
5 **OECD countries, 2012–2014**  
6  
7  
8  
9

10 Wan-Hua Hsieh,<sup>1</sup> Chien-Hsing Wang,<sup>2</sup> Tsung-Hsueh Lu<sup>3</sup>  
11  
12  
13  
14  
15

16  
17 <sup>1</sup> Department of Public Health, Tzu Chi University, Hualien, Taiwan  
18

19 <sup>2</sup> Division of Plastic Surgery, Department of Surgery and Trauma Center, Hualien Tzu Chi Hospital,  
20  
21 Buddhist Tzu Chi Medical Foundation, Hualien, Taiwan  
22  
23

24  
25 <sup>3</sup> NCKU Research Center for Health Data and Department of Public Health, National Cheng Kung  
26  
27 University, Tainan, Taiwan  
28  
29  
30  
31  
32

33 **Correspondence to**  
34

35  
36 Professor Tsung-Hsueh Lu;  
37

38  
39 robertlu@mail.ncku.edu.tw  
40  
41  
42  
43  
44  
45  
46  
47  
48  
49  
50  
51  
52  
53  
54  
55  
56  
57  
58  
59  
60

## ABSTRACT

**Objective** To compare the drowning mortality rates and proportion of deaths of each intent among all drowning deaths of the Organisation for Economic Co-operation and Development (OECD) countries, 2012-2014.

**Design** A population-based cross-sectional study.

**Setting** 32 OECD countries.

**Participants** Population died from drowning

**Main outcome measures** Drowning mortality rates (deaths per 100,000 population) and proportion (%) of deaths of each intent (i.e., unintentional intent, intentional self-harm, assault, undetermined intent, and all-intent-combined) among all drowning deaths.

**Results** Countries with the highest drowning mortality rates (deaths per 100000 population) were Estonia (3.53), Japan (3.49), and Greece (2.40) for unintentional intent; Ireland (0.96), Belgium (0.96), and Korea (0.89) for intentional self-harm; Austria (0.57), Korea (0.56), and Hungary (0.44) for undetermined intent; and Japan (4.35), Estonia (3.70), and Korea (2.73) for all-intents-combined. Korea ranked 12th and 3rd for unintentional intent and all-intents-combined, respectively. By contrast, Belgium ranked 2nd and 15th for intentional self-harm and all-intents-combined, respectively. The proportion of deaths of each intent among all drowning deaths in each country varied greatly: from 26.2% in Belgium to 96.8% in Chile for unintentional intent; 0.7% in Mexico to 57.4% in Belgium for intentional self-harm; 0.0% in nine countries to 4.9% in Mexico for assault; and 0.0% in Israel and Turkey to 38.3% in Austria for undetermined intent.

1  
2 **Conclusions** A large variation in the practice of classifying the undetermined intent of drowning  
3  
4  
5 deaths across countries was noted and this variation hinders valid international comparisons of  
6  
7  
8 intent-specific (unintentional and intentional self-harm) drowning mortality rates.  
9  
10  
11  
12  
13  
14  
15  
16  
17  
18  
19  
20  
21  
22  
23  
24  
25  
26  
27  
28  
29  
30  
31  
32  
33  
34  
35  
36  
37  
38  
39  
40  
41  
42  
43  
44  
45  
46  
47  
48  
49  
50  
51  
52  
53  
54  
55  
56  
57  
58  
59  
60

For peer review only

## Strengths and limitations of this study

- This study is the first study comparing drowning mortality rates according to intent-specific versus all-intent-combined, which can provide a more complete picture of drowning problem of a county.
- We combined mortality data for three years to ensure the statistical stability for comparisons.
- The criteria of classifying undetermined intent in each participating country was not available.

## INTRODUCTION

An international comparison of injury mortality rates is crucial to identify the unique features of the injury problem of a given country. An international comparison of unintentional drowning mortality rates indicated that drowning rate rankings of different countries differed according to age groups; the countries with the highest drowning rates were Kyrgyzstan for 0–4 years, Thailand for 5–14 years, Guyana for 15–24 years, Belarus for 25–44 years, Lithuania for 45–64 years, and Japan for  $\geq 65$  years.<sup>1</sup> However, several studies have indicated country and regional variations in the determination of intent (manner of death), such as unintentional (accidents), intentional self-harm (suicides), assault (homicides), and events of undetermined intent, which could hinder valid international comparisons of injury mortality rates.<sup>2–6</sup>

To improve the comparability between countries and across years within a single country, some scholars have proposed considering all-intent-combined versus intent-specific injury deaths to reveal a more comprehensive picture of the injury problem.<sup>7–10</sup> Theory and evidence supporting the all-intents-combined approach indicate that passive protection strategies through modification of products (smart gun or adding unpleasant odours and colours in pesticides), environmental interventions (fence on the roofs of high buildings and locking of used pesticides), and lethal means restriction (gun control and banning the use of lethal pesticides) are highly effective in preventing not only unintentional injuries but also intentional injuries.<sup>11–15</sup> The all-intents-combined approach has been used for the early identification of emerging drug-related poisoning problems in the United States and the drowning problem in Finland.<sup>16–21</sup> However, no study thus far has used the

1  
2 all-intents-combined approach to examine international variations in drowning mortality. In this  
3  
4  
5 study, we compared the drowning mortality rates and proportion of deaths of each intent among all  
6  
7  
8 drowning deaths of the Organisation for Economic Co-operation and Development (OECD)  
9  
10  
11 countries.

## 16 **METHODS**

### 19 **Study design and setting**

21  
22 This study is a population-based descriptive cross-sectional study of 32 OECD countries.

### 25 **Data source**

26  
27  
28 The population and drowning mortality data of 32 OECD countries were extracted from the World  
29  
30 Health Organization Cause of Death Query Online.<sup>22</sup> To ensure statistical stability in calculating the  
31  
32 drowning mortality rates, we combined available data from the latest 3 years. Both numerator  
33  
34 (drowning deaths) and denominator (number of population) were combined for three years. The  
35  
36 latest available year of mortality data differed across countries. For example, as of April 30, 2017,  
37  
38 the latest 3 years were 2013–2015 for 5 countries and 2012–2014 for 16 countries.

### 45 **Measures**

46  
47 The International Classification of Diseases Tenth Revision (ICD-10) codes for drowning mortality  
48  
49 of different intents are ICD-10 codes W65-W74 for unintentional intent (accident), ICD-10 code  
50  
51 X71 for intentional self-harm (suicide), ICD-10 code X92 for assault (homicide), and ICD-10 code  
52  
53 Y21 for undetermined intent.  
54  
55  
56



## Statistical analyses

We first calculated the age-standardized mortality rates (deaths per 100000 population) of each intent for each country using the US 2000 age structure 0–14, 25–24, 25–44, 45–64, 65–74, and >75 years as standard. We used bar charts to represent the variations and rankings in drowning mortality rates by intent across countries.

We then computed the proportion of deaths of each intent among all drowning deaths for each country grouped by region. The classification of country by region was based on the Global Burden of Disease study.<sup>23</sup> To demonstrate the extent of variations in death certification practices we calculated undetermined intent/intentional self-harm ratio and all-intents-combined/ unintentional intent ratio for each country. The proportion of each intent of each country was illustrated by stacked bar chart.

## Patient and Public Involvement

This study used secondary administrative data, so no patients involved in the development of the research question and outcome measures informed by patients' priorities, experience, and preferences; in the design of this study; in the recruitment to and conduct of the study.

## RESULTS

### Intent-specific mortality rates

Countries with the highest drowning mortality rate (deaths per 100000 population) were Estonia (3.53), Japan (3.49), and Greece (2.40) for unintentional intent (Figure 1); Ireland (0.96), Belgium

1  
2 (0.96), and Korea (0.89) for intentional self-harm (Figure 2); Austria (0.57), Korea (0.56), and  
3  
4  
5 Hungary (0.44) for undetermined intent (Figure 3); and Japan (4.35), Estonia (3.70), and South  
6  
7  
8 Korea (2.73) for all-intents-combined (Figure 4). South Korea ranked 12th and 3rd for unintentional  
9  
10  
11 intent and all-intents-combined, respectively. By contrast, Belgium ranked 2nd and 15th for  
12  
13  
14 intentional self-harm and all-intents-combined, respectively.

### 16 **Proportion of drowning deaths by intent**

17  
18  
19 The number and proportion of each intent among drowning deaths for each country by region are  
20  
21  
22 presented in Table 1 and Figure 5. The percentage of unintentional intent ranged from 26.2% in  
23  
24  
25 Belgium to 96.8% in Chile. The proportion of intentional self-harm ranged from 0.7% in Mexico to  
26  
27  
28 57.4% in Belgium, indicating a considerably large variation. The percentage of assault was less than  
29  
30  
31 1.0% in most countries except Mexico (4.9%) and Slovenia (1.5%). We also found a large variation  
32  
33  
34 in undetermined intent, from 0.0% in Israel and Turkey to 38.3% in Austria.

35  
36  
37 Of the 32 OECD countries included in the study, 10 had an undetermined intent proportion of  
38  
39  
40 less than 3% and 8 had a proportion of more than 15%. The undetermined intent/intentional  
41  
42  
43 self-harm ratio (an indicator of underreported suicide) was highest in Mexico (12.35, 593/48) and  
44  
45  
46 Poland (7.53, 444/59). Four out of five Central Europe countries had undetermined intent/  
47  
48  
49 intentional self-harm ratio larger than 1, suggesting relatively high proportion in reporting  
50  
51  
52 undetermined intent in Central European countries. On the other hand, the  
53  
54  
55 all-intents-combined/unintentional intent ratio was highest in Belgium (3.82, 687/180) and Austria  
56  
57  
58 (3.46, 446/129). Of 11 countries with all-intents-combined/ unintentional intent ratio larger than 2, 8

1  
2 of them were in Western Europe countries.  
3  
4  
5  
6  
7

## 8 **DISCUSSION**

9

10 The findings of this study indicate different rankings of drowning mortality rates by intent, which  
11 might be due to large variations in proportion in reporting undetermined intent and intentional  
12 self-harm among all drowning deaths across countries. This study suggests that the drowning  
13 related death certification practices associate with region of the countries. Countries in Central  
14 Europe had higher proportion in reporting undetermined intent and countries in Western Europe had  
15 higher proportion in reporting intentional self-harm.  
16  
17  
18  
19  
20  
21  
22  
23  
24  
25  
26  
27

28 According to a previous study involving eight European countries on certification practices, a  
29 legal inquiry is compulsory for every injury death in each participating country, and the inquiry is  
30 most commonly executed by legal authorities. However, differences in the classification practices  
31 (such as the efficiency of communication between the medical and legal authorities involved in  
32 suicide registration, the percentage of bodies of injury death performing forensic autopsies, level of  
33 medical training of the coders, and availability of inquiry results and forensic autopsy results to the  
34 final cause-of-death decision-maker) in different countries result in variations in the proportion of  
35 deaths classified as undetermined intent. In that study, the undetermined intent/suicide ratio was  
36 highest in Portugal during 2000–2004 (0.78) and lowest in Austria during 2003–2007 (0.07).<sup>2</sup>  
37  
38  
39  
40  
41  
42  
43  
44  
45  
46  
47  
48  
49  
50  
51  
52

53 In this study, we found 8 countries (Japan, Austria, UK, Czech Republic, Hungary, Poland,  
54 Slovakia, and Mexico) with an undetermined intent/suicide ratio of more than 1. Four out of five  
55  
56  
57  
58  
59  
60

1  
2 countries in Central Europe had undetermined intent/suicide ratio of more than 1, which indicated  
3  
4 similar certification practices among medical examiners coroners in this region. We also found 8 out  
5  
6 of 11 countries with high all-intents-combined/unintentional intent ratio were countries in Western  
7  
8 Europe region. One possible explanation was the high proportion in intentional self-harm drowning  
9  
10 deaths in this region.  
11  
12  
13  
14  
15

16  
17 With regard to the determination of intent (manner of death) of drowning death, ‘unintentional  
18  
19 intent’ could be the assigned intent when witnesses were present during the drowning incident (e.g.  
20  
21 children swimming or young people surfing in recreational water environments). By contrast, the  
22  
23 intent ‘intentional self-harm’ could be assigned if witnesses were present when someone  
24  
25 intentionally and voluntarily jumped off a bridge into a river. However, determining the intent of  
26  
27 drowning for a body found in water is difficult. According to a study conducted by Lunetta et al, of  
28  
29 1707 bodies that were found in water and were autopsied at the Department of Forensic Medicine,  
30  
31 University of Helsinki from 1976 to 2000, 276 (16.2%) cases were assigned undetermined intent.  
32  
33  
34  
35  
36  
37 Of 757 cases initially thought to be accidents by police investigators, pathologists involved with the  
38  
39 autopsies agreed in 79.4% of the cases, whereas for suicide, homicide, and undetermined intent, the  
40  
41 pathologists agreed in only 76.9%, 39.5%, and 18.7% of the cases, respectively.<sup>24</sup>  
42  
43  
44  
45  
46

47  
48 Because determining the intent of injury is difficult and because accumulated evidence  
49  
50 suggests that environmental interventions could prevent not only unintentional injuries but also  
51  
52 intentional injuries, counting injury deaths by using the all-intents-combined approach to identify  
53  
54 all injury deaths with the same mechanism is recommended.<sup>7-10</sup> For example, in the United States,  
55  
56  
57  
58  
59  
60

1  
2 poisoning (n = 31116) was the second leading injury mechanism followed by motor vehicular  
3  
4  
5 accidents (n = 37985) in 2008, when the count was restricted to only unintentional intent. However,  
6  
7  
8 when we the all-intents-combined approach was used, poisoning (n = 41080) became the first  
9  
10  
11 leading injury mechanism and superseded motor vehicular accidents (n = 37985) in 2008.<sup>20</sup>  
12

13  
14 According to the findings of this study (Table 1), 12348 drowning deaths were identified using the  
15  
16 all-intents-combined approach, which suggests that the use of this approach could identify 20%  
17  
18 more drowning deaths (n = 2108) than did the use of only the unintentional intent approach (n =  
19  
20  
21  
22 10240).  
23

## 24 25 26 27 28 **Strengths and limitations of this study**

29  
30 The strength of this study is that it is the first to compare both intent-specific and  
31  
32 all-intents-combined drowning mortality across countries. However, several limitations should be  
33  
34 considered while interpreting the findings of this study. First, we did not include water transport  
35  
36 accidents (ICD-10 codes V90-V94) in this study because of the small number of deaths resulting  
37  
38 from these accidents in most countries. Second, unlike unintentional drowning (ICD-10 codes  
39  
40 W65-W74), which provides detailed information on the body of water (bathtub, swimming pool, or  
41  
42 natural water body) and the mechanism of drowning (while in water versus following fall into  
43  
44 water), no such information are available in intentional self-harm (ICD-10 code X71), assault  
45  
46 (ICD-10 code X92), and undetermined intent (ICD-10 code Y21). Therefore, we could not further  
47  
48  
49  
50  
51  
52  
53  
54  
55  
56 analyse the body of water and mechanisms of drowning involved in intentional drowning. Third, we  
57  
58  
59  
60

1  
2 could not determine whether the considerably large variations in intentional self-harm drowning  
3  
4  
5 mortality rates across countries were caused by actual differences in suicide rates or by differences  
6  
7  
8 in classifying undetermined intent.  
9

## 10 11 12 13 CONCLUSIONS 14

15  
16 The rankings of a country with regard to drowning mortality rates differ depending on whether the  
17  
18 all-intents-combined approach or the intent-specific approach is used. The findings of this study  
19  
20 indicate a large variation in the practice of classifying the undetermined intent of drowning deaths  
21  
22 across countries and this variation hinders valid international comparisons of intent-specific  
23  
24  
25 (unintentional and intentional self-harm) drowning mortality rates.  
26  
27  
28  
29  
30  
31  
32  
33  
34  
35  
36  
37  
38  
39  
40  
41  
42  
43  
44  
45  
46  
47  
48  
49  
50  
51  
52  
53  
54  
55  
56  
57  
58  
59  
60

1  
2  
3 **Acknowledgement** The authors thank Ms. Pai-Huan Lin for data analysis.  
4

5 **Contributors** WHH collected data and performed analysis and drafted and revised the manuscript.  
6

7  
8 CHW participated the interpretation of results and drafted and revised the manuscript. THL initiated  
9  
10 the idea and participated the interpretation of results and drafted and revised the manuscript and  
11  
12 supervised the study and is the guarantor.  
13  
14

15  
16 **Funding** None  
17

18  
19 **Competing interests** The authors have no competing interests to declare.  
20  
21

22 **Ethics approval** This study was approved by the Institutional Review Boards of Chi-Mei Medical  
23  
24 Center (10406-003) and TzuChi Hospital (104-67-B).  
25  
26

27  
28 **Data sharing:** Please contact corresponding author.  
29

30 **Transparency statement:** The corresponding author confirms that the manuscript is an honest,  
31  
32 accurate, and transparent account of the study being reported; no crucial aspects of the study have  
33  
34 been omitted; and all discrepancies are disclosed.  
35  
36  
37  
38  
39  
40  
41  
42  
43  
44  
45  
46  
47  
48  
49  
50  
51  
52  
53  
54  
55  
56  
57  
58  
59  
60

**REFERENCES**

1. Lin CY, Wang CF, Lu TH, Kawachi I. Unintentional drowning mortality, by age and body of water: an analysis of 60 countries. *Inj Prev* 2015;21:e43–e50.
2. Varnik P, Sisask M, Varnick A, et al. Suicide registration in eight European countries: a qualitative analysis of procedures and practices. *Forensic Sci Int* 2010;202:86-92.
3. Rockett IRH, Kapusta ND, Bhandari R. Suicide misclassification in an international context: revisitation and update. *Suicidology* 2011;2:48-61.
4. Pritchard C, Hansen L. Examining undetermined and accidental deaths as source of ‘under-reported-suicide’ by age and sex in twenty western countries. *Community Ment Health J* 2015;51:365-376.
5. Lu TH, Sun SM, Huang SM, Lin JJ. Mind your manners? Quality of manner of death certification among medical examiners and coroners in Taiwan. *Am J Forensic Med Pathol* 2006;27:352-354.
6. Breiding MJ, Wiersema B. Variability of undetermined manner of death classification in the US. *Inj Prev* 2006;12(Suppl II):ii49-ii54.
7. McLoughlin E, Annett JL, Fingerhut L, et al. Recommended framework for presenting injury mortality data. *MMWR Recommendations and Reports* 1997;46(No RR-14):1–30.
8. Fingerhut LA, McLoughlin E. Classifying and counting injury. In: Rivara FP, Cummings P, Koepsell TD, et al, eds. *Injury control: a guide to research and program evaluation*. Cambridge: Cambridge University Press, 2001: 15–31.



- 1  
2  
3 9. Minino AM, Anderson RN, Fingerhut LA, Boudreault MA, Warner M. Deaths: Injuries, 2002.  
4  
5 *National Vital Statistics Reports*; Vol 54 No 10. Hyattsville, MD: National Center for Health  
6  
7  
8 Statistics, 2006.  
9
- 10  
11 10. Warner M, Chen LH. Surveillance of injury mortality. In Li G and Baker SP (eds). *Injury*  
12  
13 *Research: Theories, Methods, and Approaches*. New York: Springer, 2012:3-21.  
14  
15
- 16  
17 11. Peek-Asa C, Zwerling C. Role of environmental interventions in injury control and prevention.  
18  
19 *Epidemiol Rev* 2003;25:77–89.  
20  
21
- 22  
23 12. Pruss-Ustun A, Corvalan C. How much disease burden can be prevented by environmental  
24  
25 interventions? *Epidemiology* 2007;18:167-178.  
26  
27
- 28  
29 13. Pollack KM, Kercher C, Frattaroli S, Peek-Asa C, Sleet D, Rivara FP. Toward environments  
30  
31 and policies that promote injury-free active living—it wouldn't hurt. *Health Place*  
32  
33 2012;18:106-114.  
34  
35
- 36  
37 14. Florentine JB, Crane C. Suicide prevention by limiting access to methods: a review of theory  
38  
39 and practice. *Soc Sci Med* 2010;70:1626-1632.  
40  
41
- 42  
43 15. Yip PSF, Caine E, Yousuf S, Chang SS, Wu KCC, Chen YY. Means restriction for suicide  
44  
45 prevention. *Lancet* 2012;379:2393-2399.  
46  
47
- 48  
49 16. Paulozzi LJ, Anest JL. US data show sharply rising drug-induced death rates. *Inj Prev*  
50  
51 2007;13:130-132.  
52
- 53  
54 17. Paulozzi LJ, Jones C, Mack K, Rudd R. Vital signs: overdoses of prescription opioid pain  
55  
56 relievers—United States, 1999-2008. *Morb Mortal Wkly Rep* 2011;60:1487-1492.  
57  
58

- 1  
2  
3 18. Mack K. Drug-induced deaths—United States, 1999-2010. *Morb Mortal Wkly Rep*  
4  
5 2013;62:161-163.  
6  
7  
8 19. Jones CM, Mack KA, Paulozzi LJ. Pharmaceutical overdose deaths, United States, 2010.  
9  
10 *JAMA* 2013;309:657-659.  
11  
12  
13 20. Bastian B, Lu L, Miniño A, et al. Injury mortality, United States: 1999–2014. National Center  
14 for Health Statistics. National Vital Statistics System. 2016. Accessed May 20, 2017 at  
15  
16 <https://blogs.cdc.gov/nchs-data-visualization/injury-mortality-united-states-1999-2014/>  
17  
18  
19 21. Lunetta P, Smith GS, Penttila A, Sajantila A. Unintentional drowning in Finland 1970-2000: a  
20 population-based study. *Int J Epidemiol* 2004;33:1053-1063.  
21  
22  
23 22. World Health Organization. Cause of Death Query Online: A Web-Based System for  
24  
25  
26  
27  
28  
29  
30  
31  
32  
33  
34  
35  
36  
37  
38  
39  
40  
41  
42  
43  
44  
45  
46  
47  
48  
49  
50  
51  
52  
53  
54  
55  
56  
57  
58  
59  
60
23. GBD 2016 Causes of Death Collaborators. Global, regional, and national age-sex specific mortality for 264 causes of death, 1980–2016: a systematic analysis for the Global Burden of Disease Study 2016. *Lancet* 2017;390:1151–1210.
24. Lunetta P, Smith GS, Penttila A, Sajantila A. Undetermined drowning. *Med Sci Law* 2003;43:207-214.

Table 1. The number and proportion of each intent in drowning mortality in each OECD country

| Region                    | (1) All-intents-combined |       | (2) Unintentional |      | (3) Intentional self-harm |      | (4) Assault |     | (5) Undetermined intent |      | (5)/(3) | (1)/(2) |
|---------------------------|--------------------------|-------|-------------------|------|---------------------------|------|-------------|-----|-------------------------|------|---------|---------|
|                           | Country, data year       | No.   | %                 | No.  | %                         | No.  | %           | No. | %                       | No.  |         |         |
| High-income North America |                          |       |                   |      |                           |      |             |     |                         |      |         |         |
| Canada, 2010-12           | 1241                     | 100.0 | 840               | 67.7 | 301                       | 24.3 | 9           | 0.7 | 91                      | 7.3  | 0.30    | 1.48    |
| USA, 2012-14              | 12348                    | 100.0 | 10340             | 83.7 | 1200                      | 9.7  | 109         | 0.9 | 699                     | 5.7  | 0.58    | 1.19    |
| Australasia               |                          |       |                   |      |                           |      |             |     |                         |      |         |         |
| Australia, 2012-14        | 793                      | 100.0 | 591               | 74.5 | 156                       | 19.7 | 5           | 0.6 | 41                      | 5.2  | 0.26    | 1.34    |
| New Zealand, 2010-12      | 211                      | 100.0 | 175               | 82.9 | 29                        | 13.7 | 2           | 0.9 | 5                       | 2.4  | 0.17    | 1.21    |
| High-income Asia Pacific  |                          |       |                   |      |                           |      |             |     |                         |      |         |         |
| Japan, 2012-14            | 27383                    | 100.0 | 22940             | 83.8 | 2166                      | 7.9  | 10          | 0.0 | 2267                    | 8.3  | 1.05    | 1.19    |
| South Korea, 2011-13      | 4337                     | 100.0 | 1980              | 45.7 | 1441                      | 33.2 | 14          | 0.3 | 902                     | 20.8 | 0.63    | 2.19    |
| Western Europe            |                          |       |                   |      |                           |      |             |     |                         |      |         |         |
| Austria, 2012-14          | 446                      | 100.0 | 129               | 28.9 | 146                       | 32.7 | 0           | 0.0 | 171                     | 38.3 | 1.17    | 3.46    |
| Belgium, 2012-14          | 687                      | 100.0 | 180               | 26.2 | 394                       | 57.4 | 7           | 1.0 | 106                     | 15.4 | 0.27    | 3.82    |
| Denmark, 2012-14          | 205                      | 100.0 | 97                | 47.3 | 94                        | 45.9 | 1           | 0.5 | 13                      | 6.3  | 0.14    | 2.11    |
| Finland, 2012-14          | 510                      | 100.0 | 332               | 65.1 | 117                       | 22.9 | 3           | 0.6 | 58                      | 11.4 | 0.50    | 1.54    |
| France, 2011-13           | 4147                     | 100.0 | 2818              | 68.0 | 1277                      | 30.8 | 11          | 0.3 | 41                      | 1.0  | 0.03    | 1.47    |
| Germany, 2012-14          | 2295                     | 100.0 | 1271              | 55.4 | 752                       | 32.8 | 6           | 0.3 | 266                     | 11.6 | 0.35    | 1.81    |
| Greece, 2014              | 363                      | 100.0 | 349               | 96.1 | 10                        | 2.8  | 0           | 0.0 | 4                       | 1.1  | 0.40    | 1.04    |
| Ireland, 2011-13          | 348                      | 100.0 | 159               | 45.7 | 133                       | 38.2 | 1           | 0.3 | 55                      | 15.8 | 0.41    | 2.19    |
| Israel, 2012-14           | 155                      | 100.0 | 148               | 95.5 | 7                         | 4.5  | 0           | 0.0 | 0                       | 0.0  | 0.00    | 1.05    |
| Italy, 2010-12            | 1668                     | 100.0 | 1124              | 67.4 | 534                       | 32.0 | 8           | 0.5 | 2                       | 0.1  | 0.00    | 1.48    |
| Netherlands, 2013-15      | 585                      | 100.0 | 244               | 41.7 | 327                       | 55.9 | 2           | 0.3 | 12                      | 2.1  | 0.04    | 2.40    |
| Norway, 2012-14           | 265                      | 100.0 | 171               | 64.5 | 89                        | 33.6 | 0           | 0.0 | 5                       | 1.9  | 0.06    | 1.55    |
| Portugal, 2011-13         | 472                      | 100.0 | 190               | 40.3 | 191                       | 40.5 | 1           | 0.2 | 90                      | 19.1 | 0.47    | 2.48    |

|    |                         |      |       |      |      |     |      |     |     |     |      |       |      |
|----|-------------------------|------|-------|------|------|-----|------|-----|-----|-----|------|-------|------|
| 1  |                         |      |       |      |      |     |      |     |     |     |      |       |      |
| 2  | Spain, 2012-14          | 1730 | 100.0 | 1294 | 74.8 | 385 | 22.3 | 4   | 0.2 | 47  | 2.7  | 0.12  | 1.34 |
| 3  |                         |      |       |      |      |     |      |     |     |     |      |       |      |
| 4  | Sweden, 2013-15         | 594  | 100.0 | 287  | 48.3 | 207 | 34.8 | 1   | 0.2 | 99  | 16.7 | 0.48  | 2.07 |
| 5  | Switzerland, 2011-13    | 337  | 100.0 | 154  | 45.7 | 157 | 46.6 | 0   | 0.0 | 26  | 7.7  | 0.17  | 2.19 |
| 6  |                         |      |       |      |      |     |      |     |     |     |      |       |      |
| 7  | UK, 2011-13             | 1529 | 100.0 | 714  | 46.7 | 398 | 26.0 | 2   | 0.1 | 415 | 27.1 | 1.04  | 2.14 |
| 8  | Eastern Europe          |      |       |      |      |     |      |     |     |     |      |       |      |
| 9  | Estonia, 2012-14        | 161  | 100.0 | 153  | 95.0 | 5   | 3.1  | 0   | 0.0 | 3   | 1.9  | 0.60  | 1.05 |
| 10 |                         |      |       |      |      |     |      |     |     |     |      |       |      |
| 11 | Central Europe          |      |       |      |      |     |      |     |     |     |      |       |      |
| 12 | Czech Republic, 2013-15 | 627  | 100.0 | 484  | 77.2 | 63  | 10.0 | 2   | 0.3 | 78  | 12.4 | 1.24  | 1.30 |
| 13 |                         |      |       |      |      |     |      |     |     |     |      |       |      |
| 14 | Hungary, 2013-15        | 651  | 100.0 | 372  | 57.1 | 127 | 19.5 | 3   | 0.5 | 149 | 22.9 | 1.17  | 1.75 |
| 15 | Poland, 2012-14         | 3005 | 100.0 | 2502 | 83.3 | 59  | 2.0  | 0   | 0.0 | 444 | 14.8 | 7.53  | 1.20 |
| 16 |                         |      |       |      |      |     |      |     |     |     |      |       |      |
| 17 | Slovakia, 2012-14       | 434  | 100.0 | 389  | 89.6 | 16  | 3.7  | 0   | 0.0 | 29  | 6.7  | 1.81  | 1.12 |
| 18 | Slovenia, 2013-15       | 136  | 100.0 | 61   | 44.9 | 59  | 43.4 | 2   | 1.5 | 14  | 10.3 | 0.24  | 2.23 |
| 19 | Latin America           |      |       |      |      |     |      |     |     |     |      |       |      |
| 20 | Chile, 2012-14          | 1022 | 100.0 | 989  | 96.8 | 28  | 2.7  | 5   | 0.5 | 0   | 0.0  | 0.00  | 1.03 |
| 21 |                         |      |       |      |      |     |      |     |     |     |      |       |      |
| 22 | Mexico, 2012-14         | 6970 | 100.0 | 5990 | 85.9 | 48  | 0.7  | 339 | 4.9 | 593 | 8.5  | 12.35 | 1.16 |
| 23 |                         |      |       |      |      |     |      |     |     |     |      |       |      |
| 24 | Middle East             |      |       |      |      |     |      |     |     |     |      |       |      |
| 25 | Turkey, 2011-13         | 1061 | 100.0 | 1018 | 95.9 | 41  | 3.9  | 2   | 0.2 | 0   | 0.0  | 0.00  | 1.04 |

Data source: World Health Organization Cause of Death Query Online ([http://apps.who.int/healthinfo/statistics/mortality/causeofdeath\\_query/](http://apps.who.int/healthinfo/statistics/mortality/causeofdeath_query/))

**Figure legends**

Figure 1 Unintentional drowning mortality in each OECD country.

Figure 2 Intentional self-harm (suicide) drowning mortality in each OECD country.

Figure 3 Undetermined intent drowning mortality in each OECD country.

Figure 4 All-intents-combined drowning mortality in each OECD country.

Figure 5. Proportion of deaths of each intent among all drowning deaths in each OECD country.

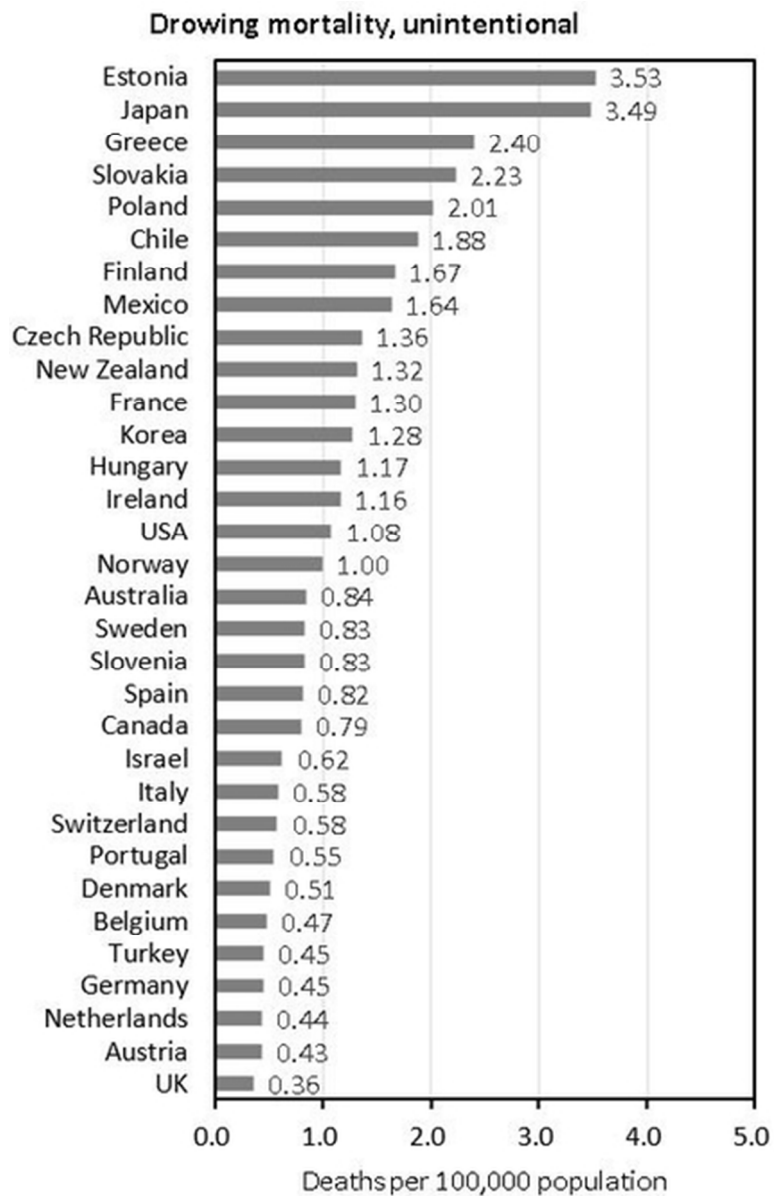

Figure 1 Unintentional drowning mortality in each OECD country.

37x56mm (300 x 300 DPI)

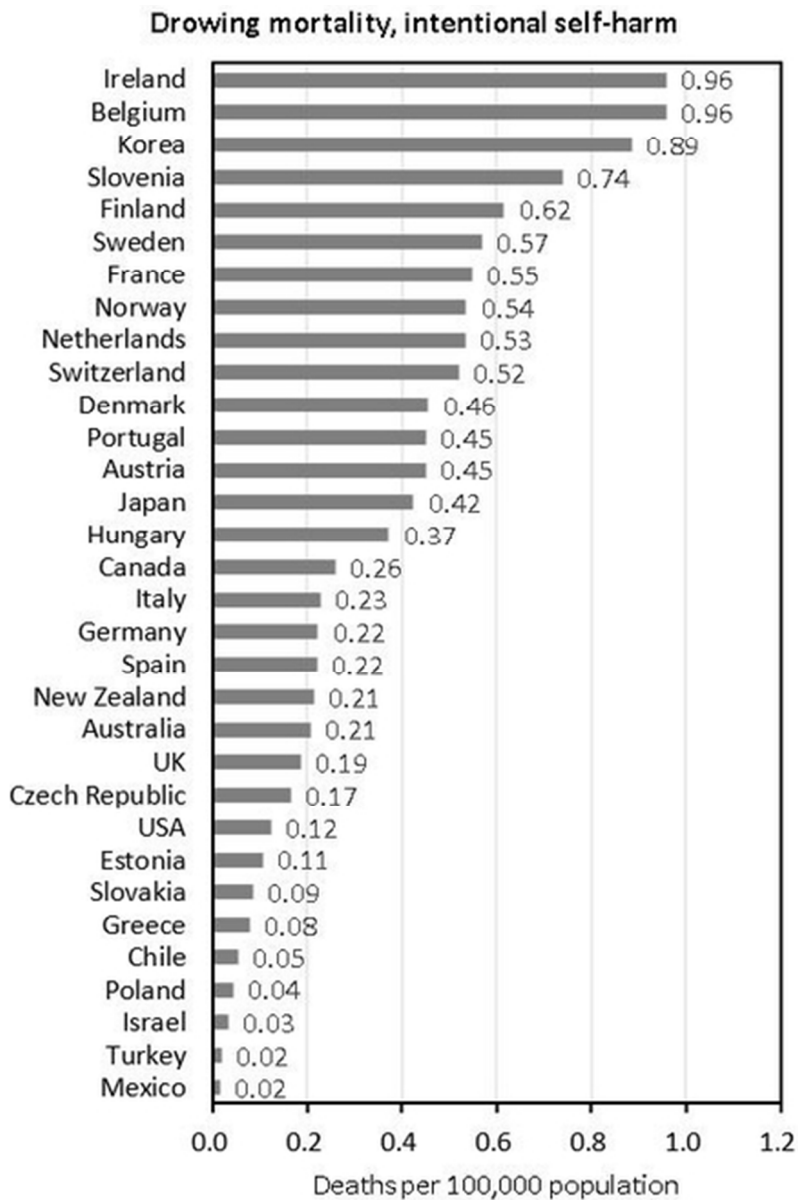

45 Figure 2 Intentional self-harm (suicide) drowning mortality in each OECD country.

46  
47 36x55mm (300 x 300 DPI)

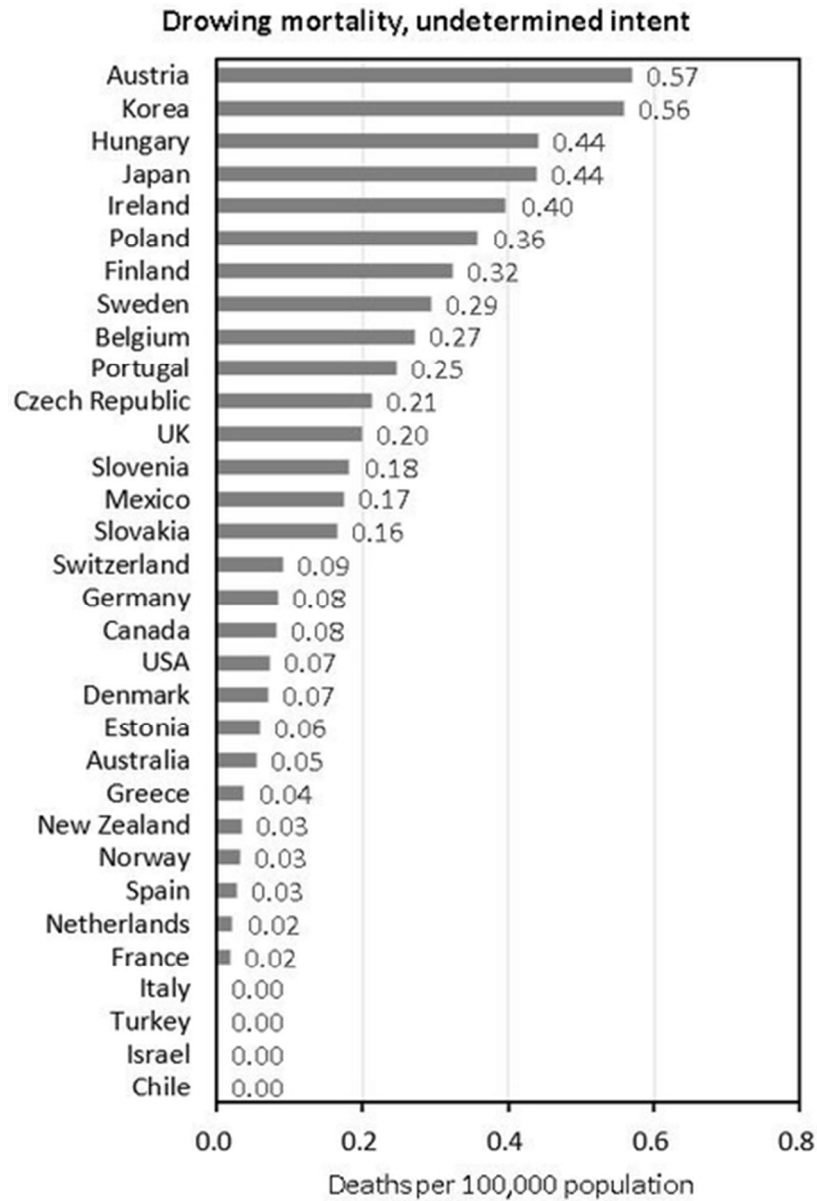

Figure 3 Undetermined intent drowning mortality in each OECD country.

36x53mm (300 x 300 DPI)



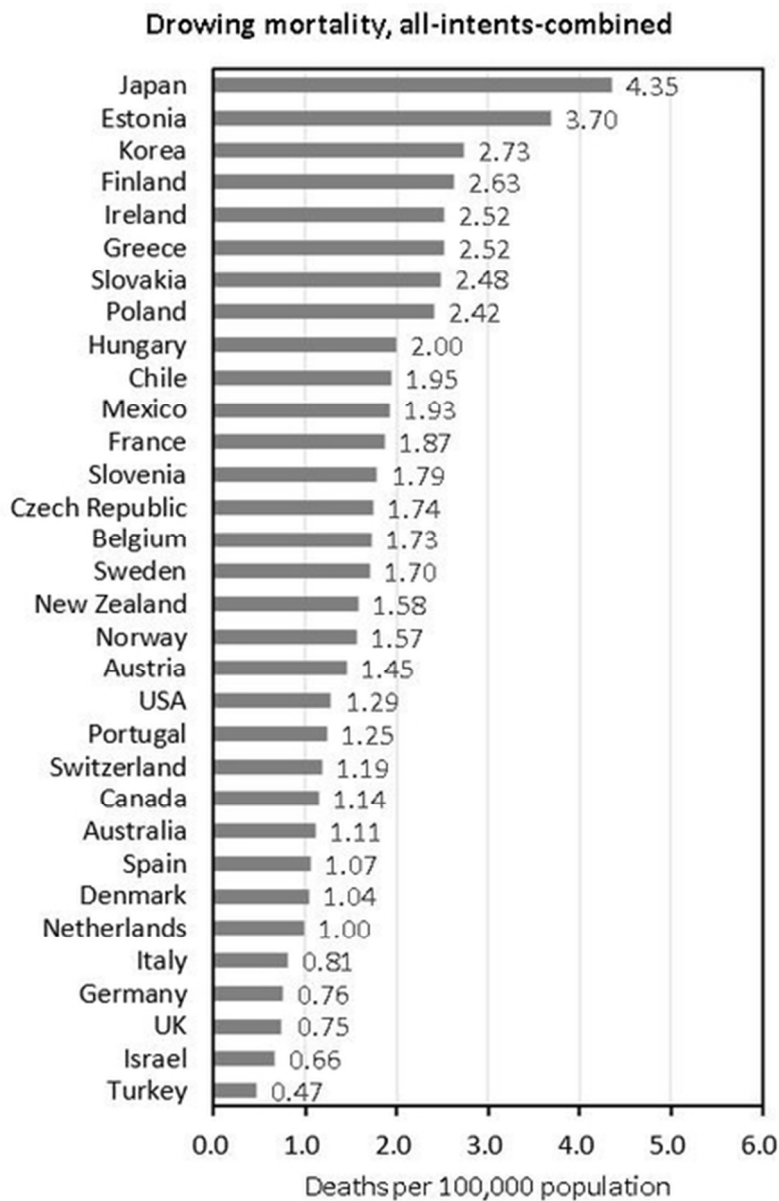

45 Figure 4 All-intents-combined drowning mortality in each OECD country.

46  
47 37x56mm (300 x 300 DPI)

1  
2  
3  
4  
5  
6  
7  
8  
9  
10  
11  
12  
13  
14  
15  
16  
17  
18  
19  
20  
21  
22  
23  
24  
25  
26  
27  
28  
29  
30  
31  
32  
33  
34  
35  
36  
37  
38  
39  
40  
41  
42  
43  
44  
45  
46  
47  
48  
49  
50  
51  
52  
53  
54  
55  
56  
57  
58  
59  
60

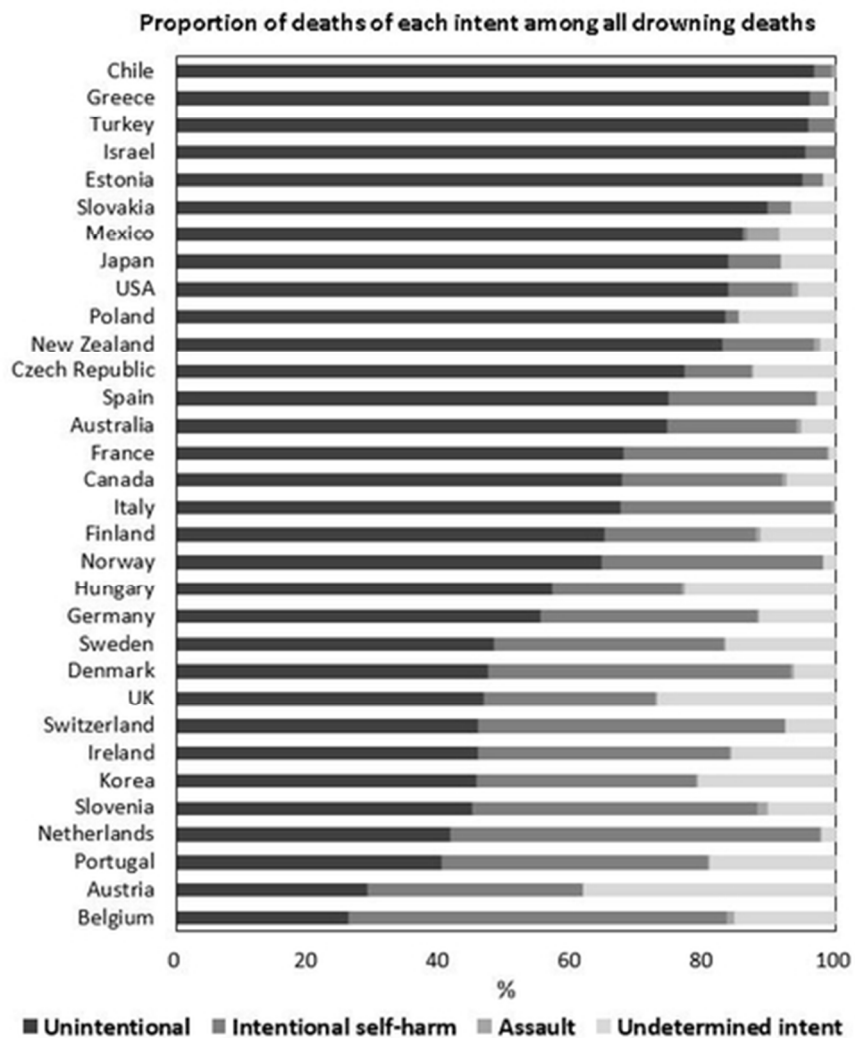

36x44mm (300 x 300 DPI)

STROBE Statement—Checklist of items that should be included in reports of *cross-sectional studies*

|                           | Item No | Recommendation                                                                                                                                                                                               | Page |
|---------------------------|---------|--------------------------------------------------------------------------------------------------------------------------------------------------------------------------------------------------------------|------|
| <b>Title and abstract</b> | 1       | (a) Indicate the study's design with a commonly used term in the title or the abstract                                                                                                                       | 1    |
|                           |         | (b) Provide in the abstract an informative and balanced summary of what was done and what was found                                                                                                          | 2    |
| <b>Introduction</b>       |         |                                                                                                                                                                                                              |      |
| Background/rationale      | 2       | Explain the scientific background and rationale for the investigation being reported                                                                                                                         | 5    |
| Objectives                | 3       | State specific objectives, including any prespecified hypotheses                                                                                                                                             | 6    |
| <b>Methods</b>            |         |                                                                                                                                                                                                              |      |
| Study design              | 4       | Present key elements of study design early in the paper                                                                                                                                                      | 6    |
| Setting                   | 5       | Describe the setting, locations, and relevant dates, including periods of recruitment, exposure, follow-up, and data collection                                                                              | 6    |
| Participants              | 6       | (a) Give the eligibility criteria, and the sources and methods of selection of participants                                                                                                                  | 6    |
| Variables                 | 7       | Clearly define all outcomes, exposures, predictors, potential confounders, and effect modifiers. Give diagnostic criteria, if applicable                                                                     | 6    |
| Data sources/measurement  | 8*      | For each variable of interest, give sources of data and details of methods of assessment (measurement). Describe comparability of assessment methods if there is more than one group                         | 6    |
| Bias                      | 9       | Describe any efforts to address potential sources of bias                                                                                                                                                    | 10   |
| Study size                | 10      | Explain how the study size was arrived at                                                                                                                                                                    | NA   |
| Quantitative variables    | 11      | Explain how quantitative variables were handled in the analyses. If applicable, describe which groupings were chosen and why                                                                                 | 6    |
| Statistical methods       | 12      | (a) Describe all statistical methods, including those used to control for confounding                                                                                                                        | 6    |
|                           |         | (b) Describe any methods used to examine subgroups and interactions                                                                                                                                          | NA   |
|                           |         | (c) Explain how missing data were addressed                                                                                                                                                                  | 10   |
|                           |         | (d) If applicable, describe analytical methods taking account of sampling strategy                                                                                                                           | NA   |
|                           |         | (e) Describe any sensitivity analyses                                                                                                                                                                        | NA   |
| <b>Results</b>            |         |                                                                                                                                                                                                              |      |
| Participants              | 13*     | (a) Report numbers of individuals at each stage of study—eg numbers potentially eligible, examined for eligibility, confirmed eligible, included in the study, completing follow-up, and analysed            | NA   |
|                           |         | (b) Give reasons for non-participation at each stage                                                                                                                                                         | NA   |
|                           |         | (c) Consider use of a flow diagram                                                                                                                                                                           | No   |
| Descriptive data          | 14*     | (a) Give characteristics of study participants (eg demographic, clinical, social) and information on exposures and potential confounders                                                                     | NA   |
|                           |         | (b) Indicate number of participants with missing data for each variable of interest                                                                                                                          | NA   |
| Outcome data              | 15*     | Report numbers of outcome events or summary measures                                                                                                                                                         | 7    |
| Main results              | 16      | (a) Give unadjusted estimates and, if applicable, confounder-adjusted estimates and their precision (eg, 95% confidence interval). Make clear which confounders were adjusted for and why they were included | No   |

|                          |    |                                                                                                                                                                            |    |
|--------------------------|----|----------------------------------------------------------------------------------------------------------------------------------------------------------------------------|----|
|                          |    | (b) Report category boundaries when continuous variables were categorized                                                                                                  | No |
|                          |    | (c) If relevant, consider translating estimates of relative risk into absolute risk for a meaningful time period                                                           | No |
| Other analyses           | 17 | Report other analyses done—eg analyses of subgroups and interactions, and sensitivity analyses                                                                             | No |
| <b>Discussion</b>        |    |                                                                                                                                                                            |    |
| Key results              | 18 | Summarise key results with reference to study objectives                                                                                                                   | 8  |
| Limitations              | 19 | Discuss limitations of the study, taking into account sources of potential bias or imprecision. Discuss both direction and magnitude of any potential bias                 | 10 |
| Interpretation           | 20 | Give a cautious overall interpretation of results considering objectives, limitations, multiplicity of analyses, results from similar studies, and other relevant evidence | 9  |
| Generalisability         | 21 | Discuss the generalisability (external validity) of the study results                                                                                                      | 9  |
| <b>Other information</b> |    |                                                                                                                                                                            |    |
| Funding                  | 22 | Give the source of funding and the role of the funders for the present study and, if applicable, for the original study on which the present article is based              | NA |

\*Give information separately for exposed and unexposed groups.

**Note:** An Explanation and Elaboration article discusses each checklist item and gives methodological background and published examples of transparent reporting. The STROBE checklist is best used in conjunction with this article (freely available on the Web sites of PLoS Medicine at <http://www.plosmedicine.org/>, Annals of Internal Medicine at <http://www.annals.org/>, and Epidemiology at <http://www.epidem.com/>). Information on the STROBE Initiative is available at [www.strobe-statement.org](http://www.strobe-statement.org).

# BMJ Open

## Drowning mortality by intent: a population-based cross-sectional study of 32 OECD countries, 2012–2014

|                                 |                                                                                                                                                                                                                                                 |
|---------------------------------|-------------------------------------------------------------------------------------------------------------------------------------------------------------------------------------------------------------------------------------------------|
| Journal:                        | <i>BMJ Open</i>                                                                                                                                                                                                                                 |
| Manuscript ID                   | bmjopen-2018-021501.R2                                                                                                                                                                                                                          |
| Article Type:                   | Research                                                                                                                                                                                                                                        |
| Date Submitted by the Author:   | 04-Jun-2018                                                                                                                                                                                                                                     |
| Complete List of Authors:       | Hsieh, Wanhua; Tzu Chi University, Department of Public Health<br>Wang, Chien-Hsing ; Buddhist Tzu Chi General Hospital, Department of Surgery and Trauma Center<br>Lu, Tsung-Hsueh; Institute of Public Health, National Cheng Kung University |
| <b>Primary Subject Heading</b>: | Epidemiology                                                                                                                                                                                                                                    |
| Secondary Subject Heading:      | Public health                                                                                                                                                                                                                                   |
| Keywords:                       | drowning, mortality, international comparisons                                                                                                                                                                                                  |
|                                 |                                                                                                                                                                                                                                                 |

SCHOLARONE™  
Manuscripts

Peer Review Only

1  
2  
3 **Drowning mortality by intent: a population-based cross-sectional study of 32**  
4  
5 **OECD countries, 2012–2014**  
6  
7  
8  
9

10 Wan-Hua Hsieh,<sup>1</sup> Chien-Hsing Wang,<sup>2</sup> Tsung-Hsueh Lu<sup>3</sup>  
11  
12  
13  
14  
15

16  
17 <sup>1</sup> Department of Public Health, Tzu Chi University, Hualien, Taiwan  
18

19 <sup>2</sup> Division of Plastic Surgery, Department of Surgery and Trauma Center, Hualien Tzu Chi Hospital,  
20  
21 Buddhist Tzu Chi Medical Foundation, Hualien, Taiwan  
22  
23

24  
25 <sup>3</sup> NCKU Research Center for Health Data and Department of Public Health, National Cheng Kung  
26  
27 University, Tainan, Taiwan  
28  
29  
30  
31  
32

33 **Correspondence to**  
34

35  
36 Professor Tsung-Hsueh Lu;  
37

38  
39 robertlu@mail.ncku.edu.tw  
40  
41  
42  
43  
44  
45  
46  
47  
48  
49  
50  
51  
52  
53  
54  
55  
56  
57  
58  
59  
60

## ABSTRACT

**Objective** To compare the drowning mortality rates and proportion of deaths of each intent among all drowning deaths in Organisation for Economic Co-operation and Development (OECD) countries in 2012–2014.

**Design** A population-based cross-sectional study.

**Setting** 32 OECD countries.

**Participants** Individuals in OECD countries who died from drowning.

**Main outcome measures** Drowning mortality rates (deaths per 100,000 population) and proportion (%) of deaths of each intent (i.e., unintentional intent, intentional self-harm, assault, undetermined intent, and all intents combined) among all drowning deaths.

**Results** Countries with the highest drowning mortality rates (deaths per 100,000 population) were Estonia (3.53), Japan (3.49), and Greece (2.40) for unintentional intent; Ireland (0.96), Belgium (0.96), and Korea (0.89) for intentional self-harm; Austria (0.57), Korea (0.56), and Hungary (0.44) for undetermined intent; and Japan (4.35), Estonia (3.70), and Korea (2.73) for all intents combined. Korea ranked 12th and third for unintentional intent and all intents combined, respectively. By contrast, Belgium ranked second and 15th for intentional self-harm and all intents combined, respectively. The proportion of deaths of each intent among all drowning deaths in each country varied greatly: from 26.2% in Belgium to 96.8% in Chile for unintentional intent; 0.7% in Mexico to 57.4% in Belgium for intentional self-harm; 0.0% in nine countries to 4.9% in Mexico for assault; and 0.0% in Israel and Turkey to 38.3% in Austria for undetermined intent.

1  
2  
3 **Conclusions** A large variation in the practice of classifying undetermined intent in drowning deaths  
4  
5 across countries was noted and this variation hinders valid international comparisons of  
6  
7  
8 intent-specific (unintentional and intentional self-harm) drowning mortality rates.  
9  
10  
11  
12  
13  
14  
15  
16  
17  
18  
19  
20  
21  
22  
23  
24  
25  
26  
27  
28  
29  
30  
31  
32  
33  
34  
35  
36  
37  
38  
39  
40  
41  
42  
43  
44  
45  
46  
47  
48  
49  
50  
51  
52  
53  
54  
55  
56  
57  
58  
59  
60

For peer review only



## Strengths and limitations of this study

- This study is the first study comparing drowning mortality rates according to intent-specific versus all intents combined, which can provide a more complete picture of drowning problems within a county.
- We combined mortality data for 3 years to ensure the statistical stability of comparisons.
- The criteria for classifying undetermined intent in each participating country was not available.

## INTRODUCTION

An international comparison of injury mortality rates is crucial to identify the unique features of injury problems within a given country. An international comparison of unintentional drowning mortality rates indicated that drowning rate rankings of different countries differed according to age groups; the countries with the highest drowning rates were Kyrgyzstan for ages 0–4 years, Thailand for ages 5–14 years, Guyana for ages 15–24 years, Belarus for ages 25–44 years, Lithuania for ages 45–64 years, and Japan for ages 65 years or more.<sup>1</sup> However, several studies have indicated country and regional variations in the determination of intent (manner of death), such as unintentional (accidents), intentional self-harm (suicides), assault (homicides), and events of undetermined intent, which could hinder valid international comparisons of injury mortality rates.<sup>2–6</sup>

To improve the comparability between countries and across years within a single country, some scholars have proposed considering all intents combined versus intent-specific injury deaths to reveal a more comprehensive picture of the injury problem.<sup>7–10</sup> Theory and evidence supporting the all-intents-combined approach indicate that passive protection strategies through modification of products (e.g. smart guns or adding unpleasant odours and colours to pesticides), environmental interventions (e.g. fences on the roofs of high buildings and securing used pesticides), and lethal means restriction (e.g. gun control and banning the use of lethal pesticides) are highly effective in preventing not only unintentional injuries but also intentional injuries.<sup>11–15</sup> The all-intents-combined approach has been used for the early identification of emerging drug-related poisoning problems in the United States and drowning problems in Finland.<sup>16–21</sup> However, no study thus far has used the

1  
2 all-intents-combined approach to examine international variations in drowning mortality. In this  
3  
4  
5 study, we compared the drowning mortality rates and proportion of deaths of each intent among all  
6  
7  
8 drowning deaths within Organisation for Economic Co-operation and Development (OECD)  
9  
10  
11 countries.

## 16 **METHODS**

### 19 **Study design and setting**

21  
22 This study was a population-based descriptive cross-sectional study of 32 OECD countries.

### 25 **Data source**

26  
27  
28 The population and drowning mortality data of 32 OECD countries were extracted from the World  
29  
30 Health Organization Cause of Death Query Online.<sup>22</sup> To ensure statistical stability in calculating the  
31  
32 drowning mortality rates, we combined available data from the most recently available 3 years.

33  
34  
35 Both numerator (drowning deaths) and denominator (population size) were combined for each  
36  
37 3-year period. The latest available year of mortality data differed across countries. For example, as  
38  
39 of April 30, 2017, the latest 3 years of data were 2013–2015 for 5 countries and 2012–2014 for 16  
40  
41  
42 countries.

### 47 **Measures**

48  
49  
50 The International Classification of Diseases Tenth Revision (ICD-10) codes for drowning mortality  
51  
52 of different intents are ICD-10 codes W65–W74 for unintentional intent (accident), ICD-10 code  
53  
54 X71 for intentional self-harm (suicide), ICD-10 code X92 for assault (homicide), and ICD-10 code  
55  
56

1  
2  
3 Y21 for undetermined intent.  
4

## 5 **Statistical analyses**

6

7  
8 We first calculated the age-standardized mortality rates (deaths per 100,000 population) of each  
9  
10 intent for each country using the US 2000 age structure (0–14, 25–24, 25–44, 45–64, 65–74, and  
11  
12 greater than or equal to 75 years) as standard. We used bar charts to represent the variations and  
13  
14 rankings in drowning mortality rates by intent across countries.  
15  
16  
17

18  
19 We then computed the proportion of deaths of each intent among all drowning deaths for each  
20  
21 country grouped by region. The classification of country by region was based on the Global Burden  
22  
23 of Disease Study.<sup>23</sup> To demonstrate the extent of variations in death certification practices, we  
24  
25 calculated an undetermined intent versus intentional self-harm ratio and an all intents combined  
26  
27 versus unintentional intent ratio for each country. The proportion of each intent for each country  
28  
29 was illustrated by stacked bar charts.  
30  
31  
32  
33  
34  
35

## 36 **Patient and Public Involvement**

37

38  
39 This study used secondary administrative data. As such, no patients were involved in the  
40  
41 development of the research questions. Outcome measures were informed by patients' priorities,  
42  
43 experience, and preferences. These conditions applied to the design of this study, in the recruitment  
44  
45 for the study, and in the conduct of the study.  
46  
47  
48  
49  
50  
51  
52

## 53 **RESULTS**

54

### 55 **Intent-specific mortality rates**

56  
57  
58  
59  
60

1  
2 Countries with the highest drowning mortality rates (deaths per 100,000 population) were Estonia  
3 (3.53), Japan (3.49), and Greece (2.40) for accidental (Figure 1); Ireland (0.96), Belgium (0.96), and  
4  
5  
6  
7 Korea (0.89) for intentional self-harm (Figure 2); Austria (0.57), Korea (0.56), and Hungary (0.44)  
8  
9  
10 for undetermined intent (Figure 3); and Japan (4.35), Estonia (3.70), and South Korea (2.73) for all  
11  
12  
13  
14  
15  
16  
17  
18  
19  
20  
21  
22  
23  
24  
25  
26  
27  
28  
29  
30  
31  
32  
33  
34  
35  
36  
37  
38  
39  
40  
41  
42  
43  
44  
45  
46  
47  
48  
49  
50  
51  
52  
53  
54  
55  
56  
57  
58  
59  
60

intents combined (Figure 4). South Korea ranked 12th and third for unintentional intent and all  
intents combined, respectively. By contrast, Belgium ranked second and 15th for intentional  
self-harm and all intents combined, respectively.

### **Proportion of drowning deaths by intent**

The numbers and proportions of each intent among drowning deaths for each country by region are  
presented in Table 1 and Figure 5. The percentage of unintentional intent ranged from 26.2% in  
Belgium to 96.8% in Chile. The proportion of intentional self-harm ranged from 0.7% in Mexico to  
57.4% in Belgium, indicating a considerably large variation. The percentage of assault was less than  
1.0% in most countries, except in Mexico (4.9%) and Slovenia (1.5%). We also found a large  
variation in undetermined intent, from 0.0% in Israel and Turkey to 38.3% in Austria.

Of the 32 OECD countries included in the study, 10 had undetermined intent proportions lower  
than 3% and eight had proportions greater than 15%. The undetermined intent versus intentional  
self-harm ratio (an indicator of underreported suicide) was highest in Mexico (12.35, 593/48) and  
Poland (7.53, 444/59). Four out of five Central European countries had undetermined intent versus  
intentional self-harm ratios larger than 1, suggesting relatively a high proportion of reported  
undetermined intent in Central European countries. By contrast, the all intents combined versus

1  
2 unintentional intent ratio was highest in Belgium (3.82, 687/180) and Austria (3.46, 446/129). Of 11  
3  
4  
5 countries with all intents combined versus unintentional intent ratios larger than 2, eight were  
6  
7  
8 Western European countries.  
9

## 10 11 12 13 **DISCUSSION**

14  
15  
16 The findings of this study indicate different rankings of drowning mortality rates by intent, which  
17  
18 might have been caused by large variations in the proportions of reported undetermined intent and  
19  
20 intentional self-harm among all drowning deaths across countries. This study suggests variability in  
21  
22 the drowning-related death certification practices associated with specific regions. For example,  
23  
24 countries in Central Europe had higher proportions of reporting undetermined intent and countries  
25  
26 in Western Europe had higher proportions of reporting intentional self-harm.  
27  
28  
29  
30  
31  
32

33  
34 According to a previous study involving the certification practices of eight European countries,  
35  
36 a legal inquiry is compulsory for every injury death in each participating country, and the inquiry is  
37  
38 most commonly executed by legal authorities. However, differences in the classification practices  
39  
40 (e.g. the efficiency of communication between the medical and legal authorities involved in suicide  
41  
42 registration, percentage of injury deaths where forensic autopsies are performed, level of medical  
43  
44 training of the coders, and availability of inquiry results and forensic autopsy results to the final  
45  
46 cause-of-death decision-maker) in different countries result in variations in the proportion of deaths  
47  
48 classified as undetermined intent. In that study, the undetermined intent versus suicide ratio was  
49  
50  
51 highest in Portugal during 2000–2004 (0.78) and lowest in Austria during 2003–2007 (0.07).<sup>2</sup>  
52  
53  
54  
55  
56  
57  
58  
59  
60

1  
2  
3 In this study, we found eight countries (Japan, Austria, UK, Czech Republic, Hungary, Poland,  
4  
5 Slovakia, and Mexico) with an undetermined intent versus suicide ratio greater than 1. Four out of  
6  
7 five countries in Central Europe had undetermined intent versus suicide ratios greater than 1, which  
8  
9 indicated similar certification practices among medical examiners and coroners in this region. We  
10  
11 also found that eight out of the 11 countries with high all intents combined versus unintentional  
12  
13 intent ratios were in Western Europe. One possible explanation for this was the high proportion in  
14  
15 intentional self-harm drowning deaths in this region.  
16  
17  
18  
19  
20  
21

22 Regarding the determination of intent (manner of death) in drowning deaths, ‘unintentional  
23  
24 intent’ could be the assigned intent when witnesses were present during the drowning incident (e.g.  
25  
26 children swimming or young people surfing in recreational water environments). By contrast, the  
27  
28 intent ‘intentional self-harm’ could be assigned if witnesses were present when someone  
29  
30 intentionally and voluntarily jumped off a bridge into a river. However, determining the intent of  
31  
32 drowning for a body found in water is difficult. According to a study conducted by Lunetta et al, of  
33  
34 1707 bodies that were found in water and were autopsied at the Department of Forensic Medicine,  
35  
36 University of Helsinki, from 1976 to 2000, 276 cases (16.2%) were assigned undetermined intent.  
37  
38 Of 757 cases initially thought to be accidents by police investigators, pathologists involved with the  
39  
40 autopsies agreed in 79.4% of the cases, whereas for suicide, homicide, and undetermined intent, the  
41  
42 pathologists agreed in only 76.9%, 39.5%, and 18.7% of the cases, respectively.<sup>24</sup>  
43  
44  
45  
46  
47  
48  
49  
50  
51  
52

53 Because determining the intent of injury is difficult and because accumulated evidence  
54  
55 suggests that environmental interventions could prevent not only unintentional injuries but also  
56  
57  
58  
59  
60

1  
2 intentional injuries, counting injury deaths by using the all-intents-combined approach to identify  
3  
4  
5 all injury deaths with the same mechanism is recommended.<sup>7-10</sup> For example, in the United States,  
6  
7  
8 poisoning (n = 31116) was the second leading injury mechanism followed by motor vehicular  
9  
10  
11 accidents (n = 37985) in 2008 when the count was restricted to only unintentional intent. However,  
12  
13  
14 when the all-intents-combined approach was used, poisoning (n = 41080) became the first leading  
15  
16  
17 injury mechanism and superseded motor vehicular accidents (n = 37985) in 2008.<sup>20</sup> According to  
18  
19  
20 the findings of this study (Table 1), 12348 drowning deaths were identified using the  
21  
22  
23 all-intents-combined approach, which suggests that the use of this approach could identify 20%  
24  
25  
26 more drowning deaths (n = 2108) than did the use of only the unintentional intent approach (n =  
27  
28  
29 10240).

### 33 Strengths and limitations of this study

34  
35  
36 The strength of this study is that it is the first to compare both intent-specific and  
37  
38  
39 all-intents-combined drowning mortality across countries. However, several limitations should be  
40  
41  
42 considered while interpreting the findings of this study. First, we did not include water transport  
43  
44  
45 accidents (ICD-10 codes V90–V94) in this study because of the small number of deaths resulting  
46  
47  
48 from these accidents in most countries. Second, unlike reports of unintentional drowning (ICD-10  
49  
50  
51 codes W65–W74), which provide detailed information on the body of water (i.e. bathtub,  
52  
53  
54 swimming pool, or natural water body) and the mechanism of drowning (i.e. while in water versus  
55  
56  
57 following fall into water), reports of intentional self-harm (ICD-10 code X71), assault (ICD-10 code



1  
2 X92), and undetermined intent (ICD-10 code Y21) provide no such information. Therefore, we  
3  
4  
5 could not further analyse the bodies of water and mechanisms of drowning involved in intentional  
6  
7  
8 drowning. Third, we could not determine whether the considerably large variations in intentional  
9  
10  
11 self-harm drowning mortality rates across countries were caused by actual differences in suicide  
12  
13  
14 rates or by differences in classifying undetermined intent.  
15

## 16 17 18 19 CONCLUSIONS

20  
21  
22 The rankings of a country with regard to drowning mortality rates differ depending on whether the  
23  
24  
25 all-intents-combined approach or the intent-specific approach is used. The findings of this study  
26  
27  
28 indicate a large variation in the practice of classifying the undetermined intent of drowning deaths  
29  
30  
31 across countries; this variation hinders valid international comparisons of intent-specific  
32  
33  
34 (unintentional and intentional self-harm) drowning mortality rates.  
35  
36  
37  
38  
39  
40  
41  
42  
43  
44  
45  
46  
47  
48  
49  
50  
51  
52  
53  
54  
55  
56  
57  
58  
59  
60

1  
2  
3 **Acknowledgement** The authors thank Ms. Pai-Huan Lin for data analysis.  
4

5 **Contributors** WHH collected data, performed analysis, and drafted and revised the manuscript.  
6

7  
8 CHW participated the interpretation of results and drafted and revised the manuscript. THL initiated  
9  
10 the idea, participated in the interpretation of results, drafted and revised the manuscript, supervised  
11  
12 the study, and is the guarantor.  
13  
14

15  
16 **Funding** None  
17

18  
19 **Competing interests** The authors have no competing interests to declare.  
20  
21

22 **Ethics approval** This study was approved by the Institutional Review Boards of the Chi-Mei  
23  
24 Medical Center (10406-003) and the Tzu Chi Hospital (104-67-B).  
25  
26

27  
28 **Data sharing:** Please contact corresponding author.  
29

30 **Transparency statement:** The corresponding author confirms that the manuscript is an honest,  
31  
32 accurate, and transparent account of the study being reported; no crucial aspects of the study have  
33  
34 been omitted; and all discrepancies are disclosed.  
35  
36  
37  
38  
39  
40  
41  
42  
43  
44  
45  
46  
47  
48  
49  
50  
51  
52  
53  
54  
55  
56  
57  
58  
59  
60

**REFERENCES**

1. Lin CY, Wang CF, Lu TH, Kawachi I. Unintentional drowning mortality, by age and body of water: an analysis of 60 countries. *Inj Prev* 2015;21:e43–e50.
2. Varnik P, Sisask M, Varnick A, et al. Suicide registration in eight European countries: a qualitative analysis of procedures and practices. *Forensic Sci Int* 2010;202:86-92.
3. Rockett IRH, Kapusta ND, Bhandari R. Suicide misclassification in an international context: revisitation and update. *Suicidology* 2011;2:48-61.
4. Pritchard C, Hansen L. Examining undetermined and accidental deaths as source of ‘under-reported-suicide’ by age and sex in twenty western countries. *Community Ment Health J* 2015;51:365-376.
5. Lu TH, Sun SM, Huang SM, Lin JJ. Mind your manners? Quality of manner of death certification among medical examiners and coroners in Taiwan. *Am J Forensic Med Pathol* 2006;27:352-354.
6. Breiding MJ, Wiersema B. Variability of undetermined manner of death classification in the US. *Inj Prev* 2006;12(Suppl II):ii49-ii54.
7. McLoughlin E, Annett JL, Fingerhut L, et al. Recommended framework for presenting injury mortality data. *MMWR Recommendations and Reports* 1997;46(No RR-14):1–30.
8. Fingerhut LA, McLoughlin E. Classifying and counting injury. In: Rivara FP, Cummings P, Koepsell TD, et al, eds. *Injury control: a guide to research and program evaluation*. Cambridge: Cambridge University Press, 2001: 15–31.

- 1  
2  
3 9. Minino AM, Anderson RN, Fingerhut LA, Boudreault MA, Warner M. Deaths: Injuries, 2002.  
4  
5 *National Vital Statistics Reports*; Vol 54 No 10. Hyattsville, MD: National Center for Health  
6  
7  
8 Statistics, 2006.  
9
- 10  
11 10. Warner M, Chen LH. Surveillance of injury mortality. In Li G and Baker SP (eds). *Injury*  
12  
13 *Research: Theories, Methods, and Approaches*. New York: Springer, 2012:3-21.  
14  
15
- 16  
17 11. Peek-Asa C, Zwerling C. Role of environmental interventions in injury control and prevention.  
18  
19 *Epidemiol Rev* 2003;25:77–89.  
20  
21
- 22  
23 12. Pruss-Ustun A, Corvalan C. How much disease burden can be prevented by environmental  
24  
25 interventions? *Epidemiology* 2007;18:167-178.  
26  
27
- 28  
29 13. Pollack KM, Kercher C, Frattaroli S, Peek-Asa C, Sleet D, Rivara FP. Toward environments  
30  
31 and policies that promote injury-free active living—it wouldn't hurt. *Health Place*  
32  
33 2012;18:106-114.  
34  
35
- 36  
37 14. Florentine JB, Crane C. Suicide prevention by limiting access to methods: a review of theory  
38  
39 and practice. *Soc Sci Med* 2010;70:1626-1632.  
40  
41
- 42  
43 15. Yip PSF, Caine E, Yousuf S, Chang SS, Wu KCC, Chen YY. Means restriction for suicide  
44  
45 prevention. *Lancet* 2012;379:2393-2399.  
46  
47
- 48  
49 16. Paulozzi LJ, Anest JL. US data show sharply rising drug-induced death rates. *Inj Prev*  
50  
51 2007;13:130-132.  
52
- 53  
54 17. Paulozzi LJ, Jones C, Mack K, Rudd R. Vital signs: overdoses of prescription opioid pain  
55  
56 relievers—United States, 1999-2008. *Morb Mortal Wkly Rep* 2011;60:1487-1492.  
57  
58

- 1  
2  
3 18. Mack K. Drug-induced deaths—United States, 1999-2010. *Morb Mortal Wkly Rep*  
4  
5 2013;62:161-163.  
6  
7
- 8 19. Jones CM, Mack KA, Paulozzi LJ. Pharmaceutical overdose deaths, United States, 2010.  
9  
10 *JAMA* 2013;309:657-659.  
11  
12
- 13 20. Bastian B, Lu L, Miniño A, et al. Injury mortality, United States: 1999–2014. National Center  
14 for Health Statistics. National Vital Statistics System. 2016. Accessed May 20, 2017 at  
15  
16 <https://blogs.cdc.gov/nchs-data-visualization/injury-mortality-united-states-1999-2014/>  
17  
18  
19
- 20 21. Lunetta P, Smith GS, Penttila A, Sajantila A. Unintentional drowning in Finland 1970-2000: a  
21 population-based study. *Int J Epidemiol* 2004;33:1053-1063.  
22  
23  
24
- 25 22. World Health Organization. Cause of Death Query Online: A Web-Based System for  
26  
27  
28  
29  
30  
31  
32  
33  
34  
35  
36  
37  
38  
39  
40  
41  
42  
43  
44  
45  
46  
47  
48  
49  
50  
51  
52  
53  
54  
55  
56  
57  
58  
59  
60  
Extracting Trend Series Detailed Cause-of-Death Data.  
[http://apps.who.int/healthinfo/statistics/mortality/causeofdeath\\_query/](http://apps.who.int/healthinfo/statistics/mortality/causeofdeath_query/) Accessed at April 30,  
2017.
23. GBD 2016 Causes of Death Collaborators. Global, regional, and national age-sex specific  
mortality for 264 causes of death, 1980–2016: a systematic analysis for the Global Burden of  
Disease Study 2016. *Lancet* 2017;390:1151–1210.
24. Lunetta P, Smith GS, Penttila A, Sajantila A. Undetermined drowning. *Med Sci Law*  
2003;43:207-214.

Table 1. The number and proportion of each intent in drowning mortality in each OECD country

| Region                    | (1) All-intents-combined |       | (2) Unintentional |      | (3) Intentional self-harm |      | (4) Assault |     | (5) Undetermined intent |      | (5)/(3) | (1)/(2) |
|---------------------------|--------------------------|-------|-------------------|------|---------------------------|------|-------------|-----|-------------------------|------|---------|---------|
|                           | Country, data year       | No.   | %                 | No.  | %                         | No.  | %           | No. | %                       | No.  |         |         |
| High-income North America |                          |       |                   |      |                           |      |             |     |                         |      |         |         |
| Canada, 2010-12           | 1241                     | 100.0 | 840               | 67.7 | 301                       | 24.3 | 9           | 0.7 | 91                      | 7.3  | 0.30    | 1.48    |
| USA, 2012-14              | 12348                    | 100.0 | 10340             | 83.7 | 1200                      | 9.7  | 109         | 0.9 | 699                     | 5.7  | 0.58    | 1.19    |
| Australasia               |                          |       |                   |      |                           |      |             |     |                         |      |         |         |
| Australia, 2012-14        | 793                      | 100.0 | 591               | 74.5 | 156                       | 19.7 | 5           | 0.6 | 41                      | 5.2  | 0.26    | 1.34    |
| New Zealand, 2010-12      | 211                      | 100.0 | 175               | 82.9 | 29                        | 13.7 | 2           | 0.9 | 5                       | 2.4  | 0.17    | 1.21    |
| High-income Asia Pacific  |                          |       |                   |      |                           |      |             |     |                         |      |         |         |
| Japan, 2012-14            | 27383                    | 100.0 | 22940             | 83.8 | 2166                      | 7.9  | 10          | 0.0 | 2267                    | 8.3  | 1.05    | 1.19    |
| South Korea, 2011-13      | 4337                     | 100.0 | 1980              | 45.7 | 1441                      | 33.2 | 14          | 0.3 | 902                     | 20.8 | 0.63    | 2.19    |
| Western Europe            |                          |       |                   |      |                           |      |             |     |                         |      |         |         |
| Austria, 2012-14          | 446                      | 100.0 | 129               | 28.9 | 146                       | 32.7 | 0           | 0.0 | 171                     | 38.3 | 1.17    | 3.46    |
| Belgium, 2012-14          | 687                      | 100.0 | 180               | 26.2 | 394                       | 57.4 | 7           | 1.0 | 106                     | 15.4 | 0.27    | 3.82    |
| Denmark, 2012-14          | 205                      | 100.0 | 97                | 47.3 | 94                        | 45.9 | 1           | 0.5 | 13                      | 6.3  | 0.14    | 2.11    |
| Finland, 2012-14          | 510                      | 100.0 | 332               | 65.1 | 117                       | 22.9 | 3           | 0.6 | 58                      | 11.4 | 0.50    | 1.54    |
| France, 2011-13           | 4147                     | 100.0 | 2818              | 68.0 | 1277                      | 30.8 | 11          | 0.3 | 41                      | 1.0  | 0.03    | 1.47    |
| Germany, 2012-14          | 2295                     | 100.0 | 1271              | 55.4 | 752                       | 32.8 | 6           | 0.3 | 266                     | 11.6 | 0.35    | 1.81    |
| Greece, 2014              | 363                      | 100.0 | 349               | 96.1 | 10                        | 2.8  | 0           | 0.0 | 4                       | 1.1  | 0.40    | 1.04    |
| Ireland, 2011-13          | 348                      | 100.0 | 159               | 45.7 | 133                       | 38.2 | 1           | 0.3 | 55                      | 15.8 | 0.41    | 2.19    |
| Israel, 2012-14           | 155                      | 100.0 | 148               | 95.5 | 7                         | 4.5  | 0           | 0.0 | 0                       | 0.0  | 0.00    | 1.05    |
| Italy, 2010-12            | 1668                     | 100.0 | 1124              | 67.4 | 534                       | 32.0 | 8           | 0.5 | 2                       | 0.1  | 0.00    | 1.48    |
| Netherlands, 2013-15      | 585                      | 100.0 | 244               | 41.7 | 327                       | 55.9 | 2           | 0.3 | 12                      | 2.1  | 0.04    | 2.40    |
| Norway, 2012-14           | 265                      | 100.0 | 171               | 64.5 | 89                        | 33.6 | 0           | 0.0 | 5                       | 1.9  | 0.06    | 1.55    |
| Portugal, 2011-13         | 472                      | 100.0 | 190               | 40.3 | 191                       | 40.5 | 1           | 0.2 | 90                      | 19.1 | 0.47    | 2.48    |

|    |                         |      |       |      |      |     |      |     |     |     |      |       |      |
|----|-------------------------|------|-------|------|------|-----|------|-----|-----|-----|------|-------|------|
| 1  |                         |      |       |      |      |     |      |     |     |     |      |       |      |
| 2  |                         |      |       |      |      |     |      |     |     |     |      |       |      |
| 3  | Spain, 2012-14          | 1730 | 100.0 | 1294 | 74.8 | 385 | 22.3 | 4   | 0.2 | 47  | 2.7  | 0.12  | 1.34 |
| 4  | Sweden, 2013-15         | 594  | 100.0 | 287  | 48.3 | 207 | 34.8 | 1   | 0.2 | 99  | 16.7 | 0.48  | 2.07 |
| 5  | Switzerland, 2011-13    | 337  | 100.0 | 154  | 45.7 | 157 | 46.6 | 0   | 0.0 | 26  | 7.7  | 0.17  | 2.19 |
| 6  |                         |      |       |      |      |     |      |     |     |     |      |       |      |
| 7  | UK, 2011-13             | 1529 | 100.0 | 714  | 46.7 | 398 | 26.0 | 2   | 0.1 | 415 | 27.1 | 1.04  | 2.14 |
| 8  | Eastern Europe          |      |       |      |      |     |      |     |     |     |      |       |      |
| 9  | Estonia, 2012-14        | 161  | 100.0 | 153  | 95.0 | 5   | 3.1  | 0   | 0.0 | 3   | 1.9  | 0.60  | 1.05 |
| 10 |                         |      |       |      |      |     |      |     |     |     |      |       |      |
| 11 | Central Europe          |      |       |      |      |     |      |     |     |     |      |       |      |
| 12 | Czech Republic, 2013-15 | 627  | 100.0 | 484  | 77.2 | 63  | 10.0 | 2   | 0.3 | 78  | 12.4 | 1.24  | 1.30 |
| 13 |                         |      |       |      |      |     |      |     |     |     |      |       |      |
| 14 | Hungary, 2013-15        | 651  | 100.0 | 372  | 57.1 | 127 | 19.5 | 3   | 0.5 | 149 | 22.9 | 1.17  | 1.75 |
| 15 |                         |      |       |      |      |     |      |     |     |     |      |       |      |
| 16 | Poland, 2012-14         | 3005 | 100.0 | 2502 | 83.3 | 59  | 2.0  | 0   | 0.0 | 444 | 14.8 | 7.53  | 1.20 |
| 17 |                         |      |       |      |      |     |      |     |     |     |      |       |      |
| 18 | Slovakia, 2012-14       | 434  | 100.0 | 389  | 89.6 | 16  | 3.7  | 0   | 0.0 | 29  | 6.7  | 1.81  | 1.12 |
| 19 |                         |      |       |      |      |     |      |     |     |     |      |       |      |
| 20 | Slovenia, 2013-15       | 136  | 100.0 | 61   | 44.9 | 59  | 43.4 | 2   | 1.5 | 14  | 10.3 | 0.24  | 2.23 |
| 21 | Latin America           |      |       |      |      |     |      |     |     |     |      |       |      |
| 22 | Chile, 2012-14          | 1022 | 100.0 | 989  | 96.8 | 28  | 2.7  | 5   | 0.5 | 0   | 0.0  | 0.00  | 1.03 |
| 23 |                         |      |       |      |      |     |      |     |     |     |      |       |      |
| 24 | Mexico, 2012-14         | 6970 | 100.0 | 5990 | 85.9 | 48  | 0.7  | 339 | 4.9 | 593 | 8.5  | 12.35 | 1.16 |
| 25 | Middle East             |      |       |      |      |     |      |     |     |     |      |       |      |
| 26 | Turkey, 2011-13         | 1061 | 100.0 | 1018 | 95.9 | 41  | 3.9  | 2   | 0.2 | 0   | 0.0  | 0.00  | 1.04 |

Data source: World Health Organization Cause of Death Query Online ([http://apps.who.int/healthinfo/statistics/mortality/causeofdeath\\_query/](http://apps.who.int/healthinfo/statistics/mortality/causeofdeath_query/))

**Figure legends**

Figure 1 Unintentional (accident) drowning mortality in each OECD country.

Figure 2 Intentional self-harm (suicide) drowning mortality in each OECD country.

Figure 3 Undetermined intent drowning mortality in each OECD country.

Figure 4 All intents combined drowning mortality in each OECD country.

Figure 5. Proportion of deaths of each intent among all drowning deaths in each OECD country.



1  
2  
3  
4  
5  
6  
7  
8  
9  
10  
11  
12  
13  
14  
15  
16  
17  
18  
19  
20  
21  
22  
23  
24  
25  
26  
27  
28  
29  
30  
31  
32  
33  
34  
35  
36  
37  
38  
39  
40  
41  
42  
43  
44  
45  
46  
47  
48  
49  
50  
51  
52  
53  
54  
55  
56  
57  
58  
59  
60

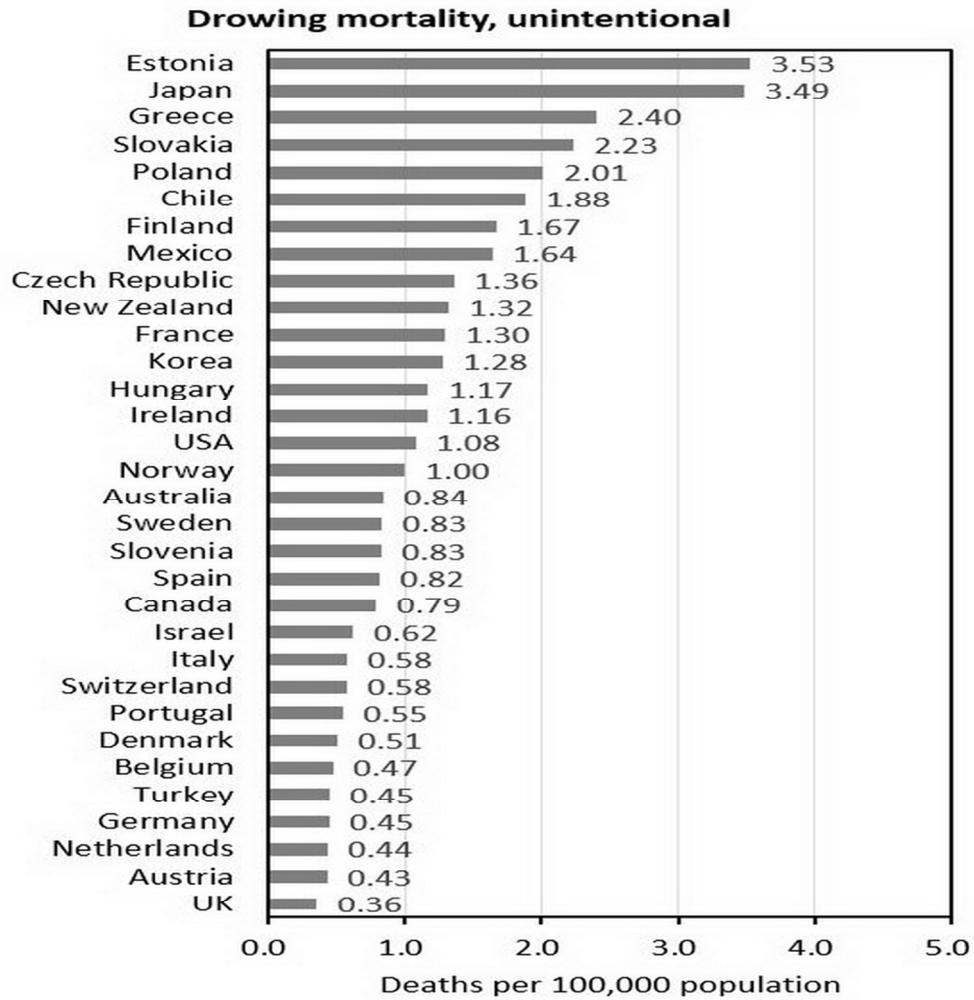

Figure 1 Unintentional (accident) drowning mortality in each OECD country.

90x90mm (300 x 300 DPI)

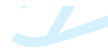

1  
2  
3  
4  
5  
6  
7  
8  
9  
10  
11  
12  
13  
14  
15  
16  
17  
18  
19  
20  
21  
22  
23  
24  
25  
26  
27  
28  
29  
30  
31  
32  
33  
34  
35  
36  
37  
38  
39  
40  
41  
42  
43  
44  
45  
46  
47  
48  
49  
50  
51  
52  
53  
54  
55  
56  
57  
58  
59  
60

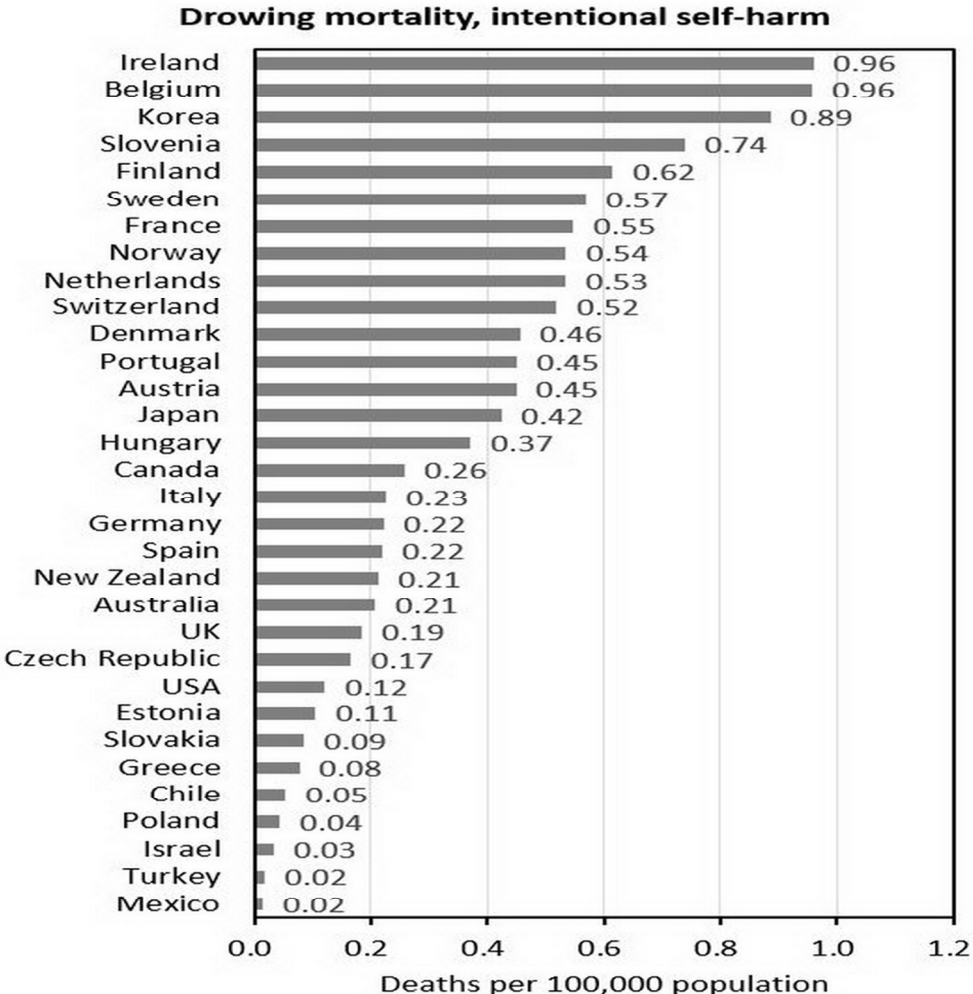

Figure 2 Intentional self-harm (suicide) drowning mortality in each OECD country.

90x90mm (300 x 300 DPI)

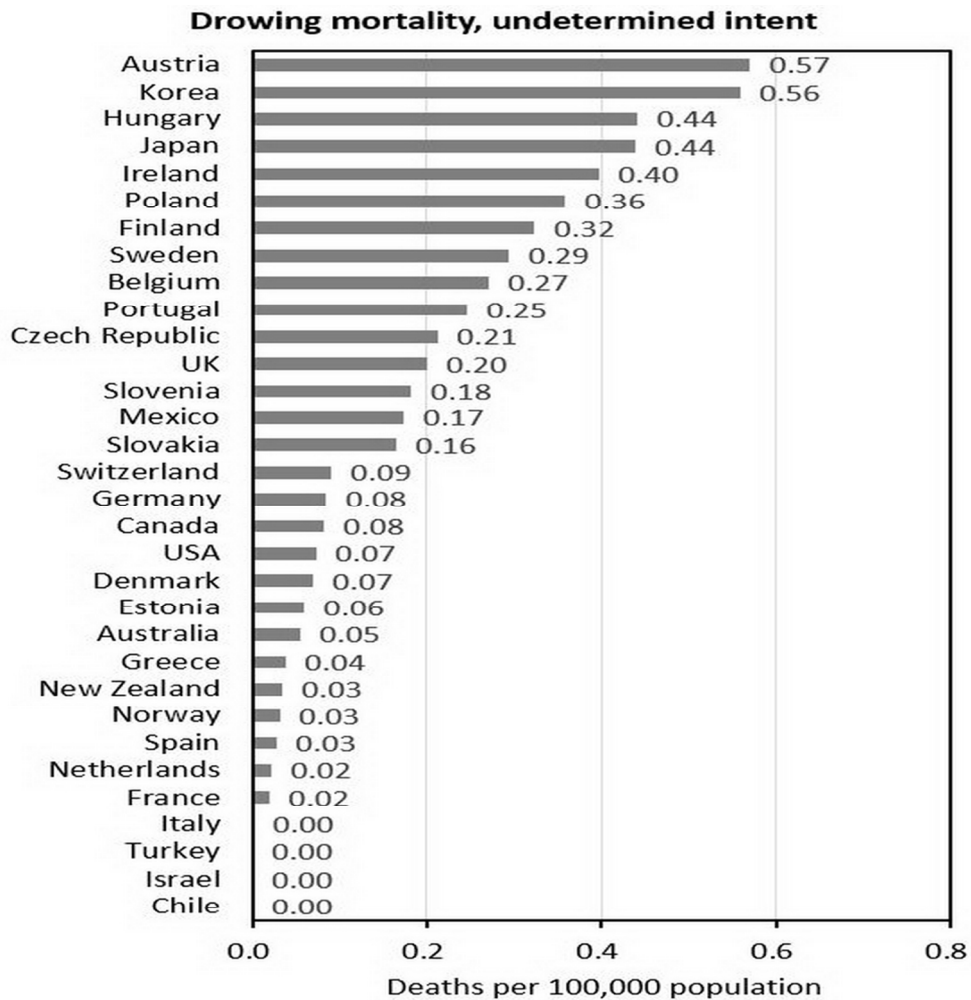

Figure 3 Undetermined intent drowning mortality in each OECD country.

90x90mm (300 x 300 DPI)

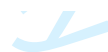

1  
2  
3  
4  
5  
6  
7  
8  
9  
10  
11  
12  
13  
14  
15  
16  
17  
18  
19  
20  
21  
22  
23  
24  
25  
26  
27  
28  
29  
30  
31  
32  
33  
34  
35  
36  
37  
38  
39  
40  
41  
42  
43  
44  
45  
46  
47  
48  
49  
50  
51  
52  
53  
54  
55  
56  
57  
58  
59  
60

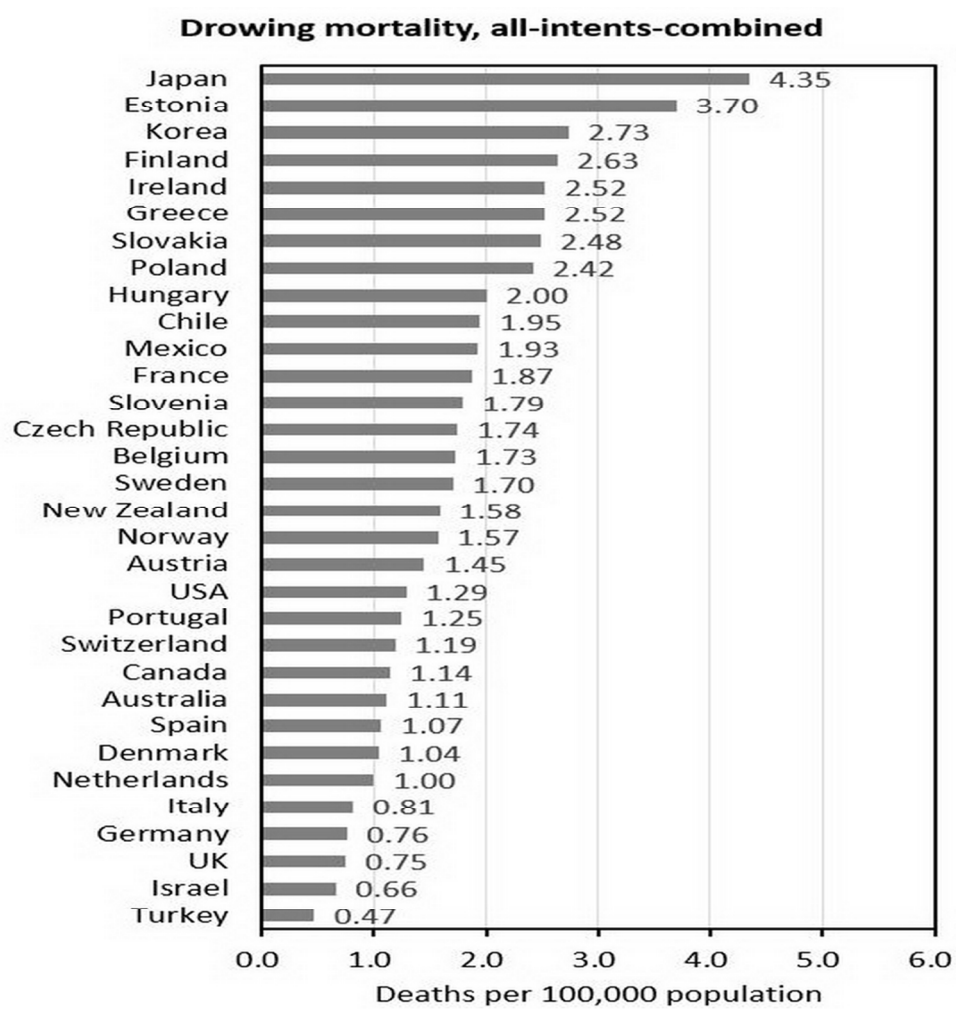

Figure 4 All intents combined drowning mortality in each OECD country.

90x90mm (300 x 300 DPI)

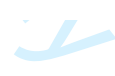

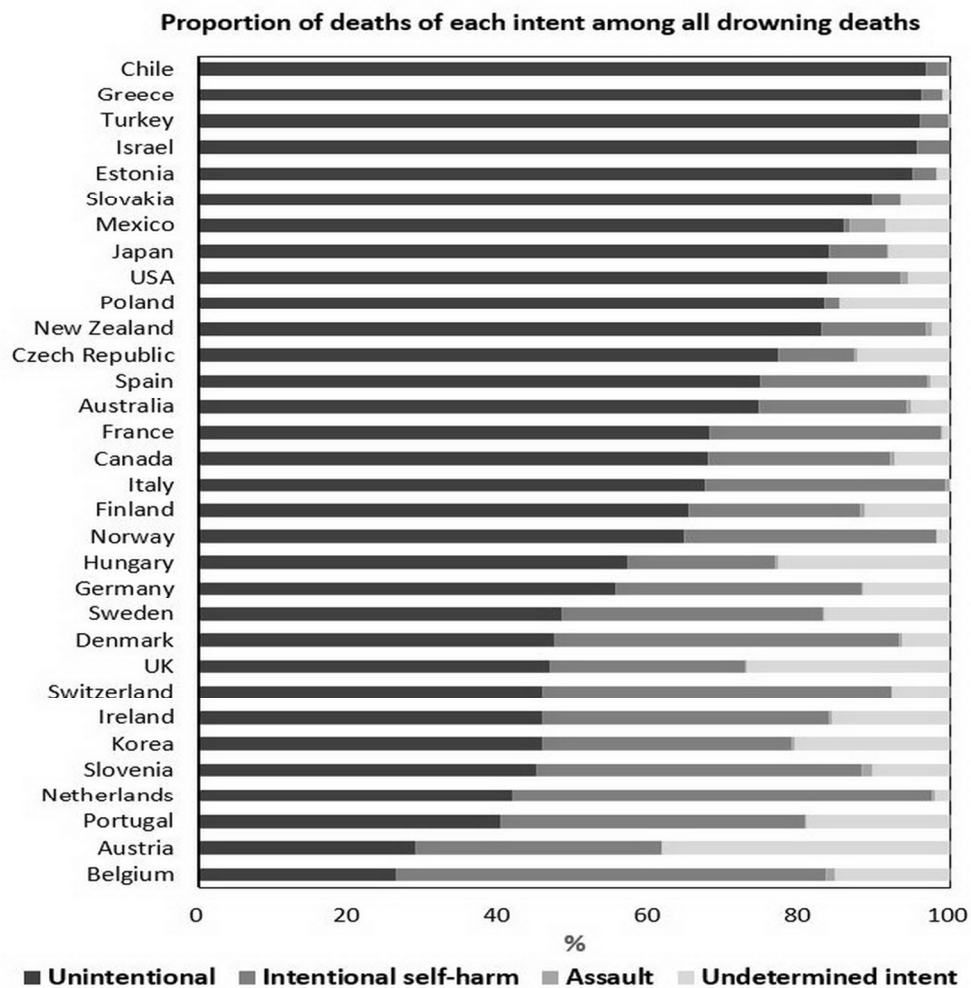

Figure 5. Proportion of deaths of each intent among all drowning deaths in each OECD country.

90x90mm (300 x 300 DPI)



STROBE Statement—Checklist of items that should be included in reports of *cross-sectional studies*

|                           | Item No | Recommendation                                                                                                                                                                                               | Page |
|---------------------------|---------|--------------------------------------------------------------------------------------------------------------------------------------------------------------------------------------------------------------|------|
| <b>Title and abstract</b> | 1       | (a) Indicate the study's design with a commonly used term in the title or the abstract                                                                                                                       | 1    |
|                           |         | (b) Provide in the abstract an informative and balanced summary of what was done and what was found                                                                                                          | 2    |
| <b>Introduction</b>       |         |                                                                                                                                                                                                              |      |
| Background/rationale      | 2       | Explain the scientific background and rationale for the investigation being reported                                                                                                                         | 5    |
| Objectives                | 3       | State specific objectives, including any prespecified hypotheses                                                                                                                                             | 6    |
| <b>Methods</b>            |         |                                                                                                                                                                                                              |      |
| Study design              | 4       | Present key elements of study design early in the paper                                                                                                                                                      | 6    |
| Setting                   | 5       | Describe the setting, locations, and relevant dates, including periods of recruitment, exposure, follow-up, and data collection                                                                              | 6    |
| Participants              | 6       | (a) Give the eligibility criteria, and the sources and methods of selection of participants                                                                                                                  | 6    |
| Variables                 | 7       | Clearly define all outcomes, exposures, predictors, potential confounders, and effect modifiers. Give diagnostic criteria, if applicable                                                                     | 6    |
| Data sources/measurement  | 8*      | For each variable of interest, give sources of data and details of methods of assessment (measurement). Describe comparability of assessment methods if there is more than one group                         | 6    |
| Bias                      | 9       | Describe any efforts to address potential sources of bias                                                                                                                                                    | 10   |
| Study size                | 10      | Explain how the study size was arrived at                                                                                                                                                                    | NA   |
| Quantitative variables    | 11      | Explain how quantitative variables were handled in the analyses. If applicable, describe which groupings were chosen and why                                                                                 | 6    |
| Statistical methods       | 12      | (a) Describe all statistical methods, including those used to control for confounding                                                                                                                        | 6    |
|                           |         | (b) Describe any methods used to examine subgroups and interactions                                                                                                                                          | NA   |
|                           |         | (c) Explain how missing data were addressed                                                                                                                                                                  | 10   |
|                           |         | (d) If applicable, describe analytical methods taking account of sampling strategy                                                                                                                           | NA   |
|                           |         | (e) Describe any sensitivity analyses                                                                                                                                                                        | NA   |
| <b>Results</b>            |         |                                                                                                                                                                                                              |      |
| Participants              | 13*     | (a) Report numbers of individuals at each stage of study—eg numbers potentially eligible, examined for eligibility, confirmed eligible, included in the study, completing follow-up, and analysed            | NA   |
|                           |         | (b) Give reasons for non-participation at each stage                                                                                                                                                         | NA   |
|                           |         | (c) Consider use of a flow diagram                                                                                                                                                                           | No   |
| Descriptive data          | 14*     | (a) Give characteristics of study participants (eg demographic, clinical, social) and information on exposures and potential confounders                                                                     | NA   |
|                           |         | (b) Indicate number of participants with missing data for each variable of interest                                                                                                                          | NA   |
| Outcome data              | 15*     | Report numbers of outcome events or summary measures                                                                                                                                                         | 7    |
| Main results              | 16      | (a) Give unadjusted estimates and, if applicable, confounder-adjusted estimates and their precision (eg, 95% confidence interval). Make clear which confounders were adjusted for and why they were included | No   |

|                          |    |                                                                                                                                                                            |    |
|--------------------------|----|----------------------------------------------------------------------------------------------------------------------------------------------------------------------------|----|
|                          |    | (b) Report category boundaries when continuous variables were categorized                                                                                                  | No |
|                          |    | (c) If relevant, consider translating estimates of relative risk into absolute risk for a meaningful time period                                                           | No |
| Other analyses           | 17 | Report other analyses done—eg analyses of subgroups and interactions, and sensitivity analyses                                                                             | No |
| <b>Discussion</b>        |    |                                                                                                                                                                            |    |
| Key results              | 18 | Summarise key results with reference to study objectives                                                                                                                   | 8  |
| Limitations              | 19 | Discuss limitations of the study, taking into account sources of potential bias or imprecision. Discuss both direction and magnitude of any potential bias                 | 10 |
| Interpretation           | 20 | Give a cautious overall interpretation of results considering objectives, limitations, multiplicity of analyses, results from similar studies, and other relevant evidence | 9  |
| Generalisability         | 21 | Discuss the generalisability (external validity) of the study results                                                                                                      | 9  |
| <b>Other information</b> |    |                                                                                                                                                                            |    |
| Funding                  | 22 | Give the source of funding and the role of the funders for the present study and, if applicable, for the original study on which the present article is based              | NA |

\*Give information separately for exposed and unexposed groups.

**Note:** An Explanation and Elaboration article discusses each checklist item and gives methodological background and published examples of transparent reporting. The STROBE checklist is best used in conjunction with this article (freely available on the Web sites of PLoS Medicine at <http://www.plosmedicine.org/>, Annals of Internal Medicine at <http://www.annals.org/>, and Epidemiology at <http://www.epidem.com/>). Information on the STROBE Initiative is available at [www.strobe-statement.org](http://www.strobe-statement.org).
